# 1 **Cell type composition and circuit organization**

## 2 **of neocortical radial clones**

3

4 Cathryn R. Cadwell<sup>1,2,3,\*</sup>, Federico Scala<sup>1,2</sup>, Paul G. Fahey<sup>1,2</sup>, Dmitry Kobak<sup>4</sup>, Fabian H.

5 Sinz<sup>1,2,5</sup>, Per Johnsson<sup>6</sup>, Shuang Li<sup>1,2</sup>, R. James Cotton<sup>1,2</sup>, Rickard Sandberg<sup>6</sup>, Philipp

6 Berens<sup>4,5</sup>, Xiaolong Jiang<sup>1,2,7,\*</sup> and Andreas S. Tolias<sup>1,2,8,9,\*</sup>

7

8 <sup>1</sup> Department of Neuroscience, Baylor College of Medicine, Houston, TX, USA

9 <sup>2</sup> Center for Neuroscience and Artificial Intelligence, Baylor College of Medicine, Houston, TX, USA

10 <sup>3</sup> Department of Anatomic Pathology, University of California San Francisco, San Francisco, CA, USA

11 <sup>4</sup> Institute for Ophthalmic Research, University of Tübingen, Tübingen, Germany

12 <sup>5</sup> Department of Computer Science, University of Tübingen, Tübingen, Germany

13 <sup>6</sup> Department of Cell and Molecular Biology, Karolinska Institutet, Stockholm, Sweden

14 <sup>7</sup> Jan and Dan Duncan Neurological Research Institute at Texas Children's Hospital, Houston, Texas, USA

15 <sup>8</sup> Department of Electrical and Computer Engineering, Rice University, Houston, Texas, USA

16 <sup>9</sup> Lead Contact: [astolias@bcm.edu](mailto:astolias@bcm.edu)

17 \* Co-corresponding authors

## 18 **Summary**

19 Excitatory neurons arising from a common progenitor establish radially-oriented clonal  
20 units in the neocortex which have been proposed to serve as elementary information  
21 processing modules. To characterize the cell types and circuit diagram within these  
22 clonal units, we performed single-cell RNA-sequencing and multi-cell patch clamp  
23 recordings of neurons derived from *Nestin*-positive progenitors. We found that radial  
24 clones do not appear to be fate-restricted, but instead individual clones are composed of  
25 a random sampling of the transcriptomic cell types present in a particular cortical area.  
26 The effect of lineage on synaptic connectivity depends on the type of connection tested:  
27 pairs of clonally related neurons were more likely to be connected vertically, across  
28 cortical layers, but not laterally within the same layer, compared to unrelated pairs. We  
29 propose that integration of vertical input from related neurons with lateral input from  
30 unrelated neurons may represent a developmentally programmed motif for assembling  
31 neocortical circuits.

## 32 Introduction

33 The mammalian neocortex carries out complex mental processes such as cognition and  
34 perception through the interaction of billions of neurons connected by trillions of  
35 synapses. We are just beginning to understand how networks of neurons become wired  
36 together during development to give rise to cortical computations (Polleux et al., 2007).  
37 During cortical neurogenesis, which lasts from approximately embryonic day 10.5  
38 (E10.5) through E17.5 in the mouse (Caviness et al., 1995, Takahashi et al., 1996), radial  
39 glial cells (RGCs) undergo asymmetric division to generate postmitotic excitatory  
40 neurons that migrate radially to populate the cortical plate. Neurogenesis occurs in an  
41 inside-out gradient, such that early-born neurons occupy the deep cortical layers and  
42 later-born neurons reside in progressively more superficial layers (Angevine and  
43 Sidman, 1961, Rakic, 1974, Caviness et al., 1995). An individual RGC gives rise to a  
44 radial unit of clonally related excitatory neurons, sometimes referred to as an *ontogenetic*  
45 *column*, spanning cortical layers 2–6 (Torii et al., 2009, Kriegstein and Noctor, 2004,  
46 Noctor et al., 2001, Noctor et al., 2007). However, these radial units of clonally related  
47 neurons are only loosely clustered and are intermixed with numerous nearby unrelated  
48 neurons (Walsh and Cepko, 1988; Tan et al., 1995). In contrast to excitatory neurons,  
49 inhibitory interneurons are generated in specialized regions of the ventral  
50 telencephalon and migrate tangentially to disperse throughout the developing cortical  
51 mantle (Letinic et al., 2002, Kriegstein and Noctor, 2004, Tan et al., 1998, Mayer et al.,  
52 2015).

53 Recent advances in single-cell RNA-sequencing technology (Tang et al., 2009,  
54 Picelli et al., 2013, Picelli et al., 2014a) have enabled unbiased cell type classification in  
55 heterogeneous tissues including the cerebral cortex (Zeisel et al., 2015, Tasic et al., 2016,

56 Tasic et al., 2018). An emerging principle is that, in contrast to inhibitory interneurons,  
57 excitatory neurons in the adult mouse (Tasic et al., 2018) and developing human  
58 (Nowakowski et al., 2017) cortex are largely region-specific at the level of transcriptomic  
59 cell types, with several dozens of excitatory cell types per area (Tasic et al., 2018, Hodge  
60 et al., 2018). While it is well-established that the vast majority of cells within radial  
61 clones are excitatory neurons (Tan et al., 1998), it remains controversial whether  
62 individual RGCs can give rise to the full diversity of excitatory neuron cell types within  
63 a given cortical area, or whether individual progenitors give rise to a restricted subset of  
64 transcriptomic cell types (Eckler et al., 2015, Llorca et al., 2018).

65 A series of studies used a retroviral lineage tracing method to show that clonally  
66 related excitatory neurons are more likely to be synaptically connected to each other  
67 (Yu et al., 2009, Yu et al., 2012, He et al., 2015) and also tend to have similar preferred  
68 orientations in primary visual cortex (V1) compared to unrelated neurons (Li et al.,  
69 2012), consistent with the longstanding hypothesis that radial clones may constitute  
70 elementary circuit modules for information processing in the cortex (Mountcastle, 1997,  
71 Rakic, 1988, Buxhoeveden and Casanova, 2002). The vertical, across-layer connections  
72 between related neurons were described as having a similar directional preference as  
73 that found in adult cortex (Yu et al., 2009); however, layer-specific vertical connections  
74 were not analyzed independently to directly compare related and unrelated pairs.  
75 Moreover, no data were reported for lateral connections between clonally related cells  
76 within the same cortical layer. Therefore, it remains unclear whether all local  
77 connections are more likely to occur between clonally related neurons, as has become  
78 the dogma in the field (Li et al., 2018), or only specific layer-defined connection types.  
79 Given the complexity of the local cortical circuit and the different functional roles of

80 layer-defined connections (Lefort et al., 2009, Feldmeyer, 2012, Lubke et al., 2000, Lubke  
81 et al., 2003), clarifying the effect of cell lineage on the underlying layer-specific  
82 connectivity matrix may have important implications regarding the mechanism and  
83 purpose of lineage-driven connectivity. The difficulty of multi-patching experiments  
84 combined with the relatively low connectivity rates between excitatory neurons (Jiang  
85 et al., 2015, Markram et al., 1997, Barth et al., 2016, Jiang et al., 2016) necessitate testing a  
86 very high number of connections and poses an enormous technical challenge to address  
87 this question.

88         Using an enhancer trap Cre-line to label progenitors at an earlier developmental  
89 stage, yielding much larger clones (approximately 670-800 neurons per clone compared  
90 to 4-6 neurons per clone in Yu et al., 2009), a separate group has reported a much  
91 smaller effect of cell lineage on orientation tuning in V1 (Ohtsuki et al., 2012), calling  
92 into question the generalizability of cell lineage as an important determinant of large-  
93 scale functional circuits (Smith and Fitzpatrick, 2012). While one study has examined  
94 lateral connections within layer 4 (L4) of large clones labeled in chimeric mice  
95 (Tarusawa et al., 2016), the effect of cell lineage on other layer-defined connection types  
96 has not been systematically studied in large clones. This represents a major obstacle in  
97 translating the idea of lineage-dependent circuit assembly into a practical model of  
98 cortical circuit development.

99         Here we use a tamoxifen-inducible Cre-lox system to label progenitors precisely  
100 at the onset of neurogenesis, resulting in intermediate-sized radial clones (86 neurons  
101 on average; Figure 1) spanning cortical layers 2-6 to ask: a) what is the cell type  
102 composition of individual clones and b) what is the layer-specific connectivity matrix  
103 among clonally related excitatory neurons. We find that radial clones of excitatory

104 neurons are composed of diverse transcriptomic cell types with no evidence of cell type  
105 fate restriction compared to nearby unrelated neurons. In addition, vertical connections  
106 linking cells across cortical layers, and in particular vertical inputs to cortical layer 5,  
107 were selectively increased among clonally related neurons with no change in lateral  
108 connections within the same cortical layer. These findings suggest a revision of the  
109 current dogma of universally increased connectivity among clonally related excitatory  
110 neurons and suggest that integration of vertical input from related neurons within  
111 radial units and lateral input from unrelated neurons may represent a developmentally  
112 programmed blueprint for the construction of functional neocortical circuits.

## 113 **Results**

### 114 *Tamoxifen induction at E10.5 generates radial clones spanning superficial and deep* 115 *cortical layers*

116 To label radial clones, we induced sparse recombination in RGCs at approximately the  
117 onset of neurogenesis using a tamoxifen-inducible Cre-lox transgenic system driven by  
118 the *Nestin* promoter (Figures 1A-1B). In contrast to viral lineage tracing methods, which  
119 are routinely performed at E12.5 or later (Yu et al., 2009, Yu et al., 2012, Li et al., 2012),  
120 and enhancer trap methods (Ohtsuki et al., 2012), which do not allow precise control of  
121 the labeling time (i.e. number of neurons per clone) or density (i.e. number of clones per  
122 brain), our approach enabled us to empirically determine the optimal dosing and time  
123 point to sparsely label radial clones (Figure 1C). When tamoxifen was administered  
124 shortly before the onset of neurogenesis, at E9.5, the resulting clones at P10 contained

125 288 neurons (median, interquartile range [IQR] 196–525 neurons) and spanned 383  $\mu\text{m}$   
126 in width (median, IQR 311–428  $\mu\text{m}$ ; n=21 clones from two animals; Figures 1D–E).  
127 When tamoxifen was administered at approximately the onset of neurogenesis, at E10.5,  
128 the resulting clones at P10 contained 86 neurons (median, IQR 27–150) and spanned 235  
129  $\mu\text{m}$  in width (median, IQR 141–327  $\mu\text{m}$ ; n=21 clones from two animals; Figures 1D–E).  
130 The substantial decrease in clone width and neuron number between clones labeled at  
131 E9.5 and those labeled at E10.5 suggests inducing recombination prior to E10.5 leads to  
132 the labeling of a substantial number of neuroepithelial stem cells still undergoing  
133 symmetric cell division to generate multiple radial glial cells. When tamoxifen was  
134 administered shortly after the onset of neurogenesis, at E11.5, the resulting clones at P10  
135 contained 40 neurons (median, IQR 26–61) and spanned 222  $\mu\text{m}$  in width (median, IQR  
136 162–280  $\mu\text{m}$ ; n=31 clones from two animals; Figures 1D–E), similar to the width of  
137 clones labeled at E10.5. Moreover, a substantial fraction of clones labeled by induction  
138 at E11.5 were restricted to the superficial cortical layers (L2–4; 7/31 clones, 23%), which  
139 was never seen in clones labeled by induction at E9.5 or E10.5 where they spanned  
140 layers 2 to 6 (Figures 1F and S1). This finding is consistent with the model that radial  
141 glia contribute to all excitatory cortical layers, but also suggests that at least some radial  
142 glia no longer generate deep layer neurons after E11.5, consistent with the inside-out  
143 model of excitatory neurogenesis. Given the plateau of clone width when induced at  
144 E10.5 or E11.5 and the presence of incomplete clones when induced at E11.5, we

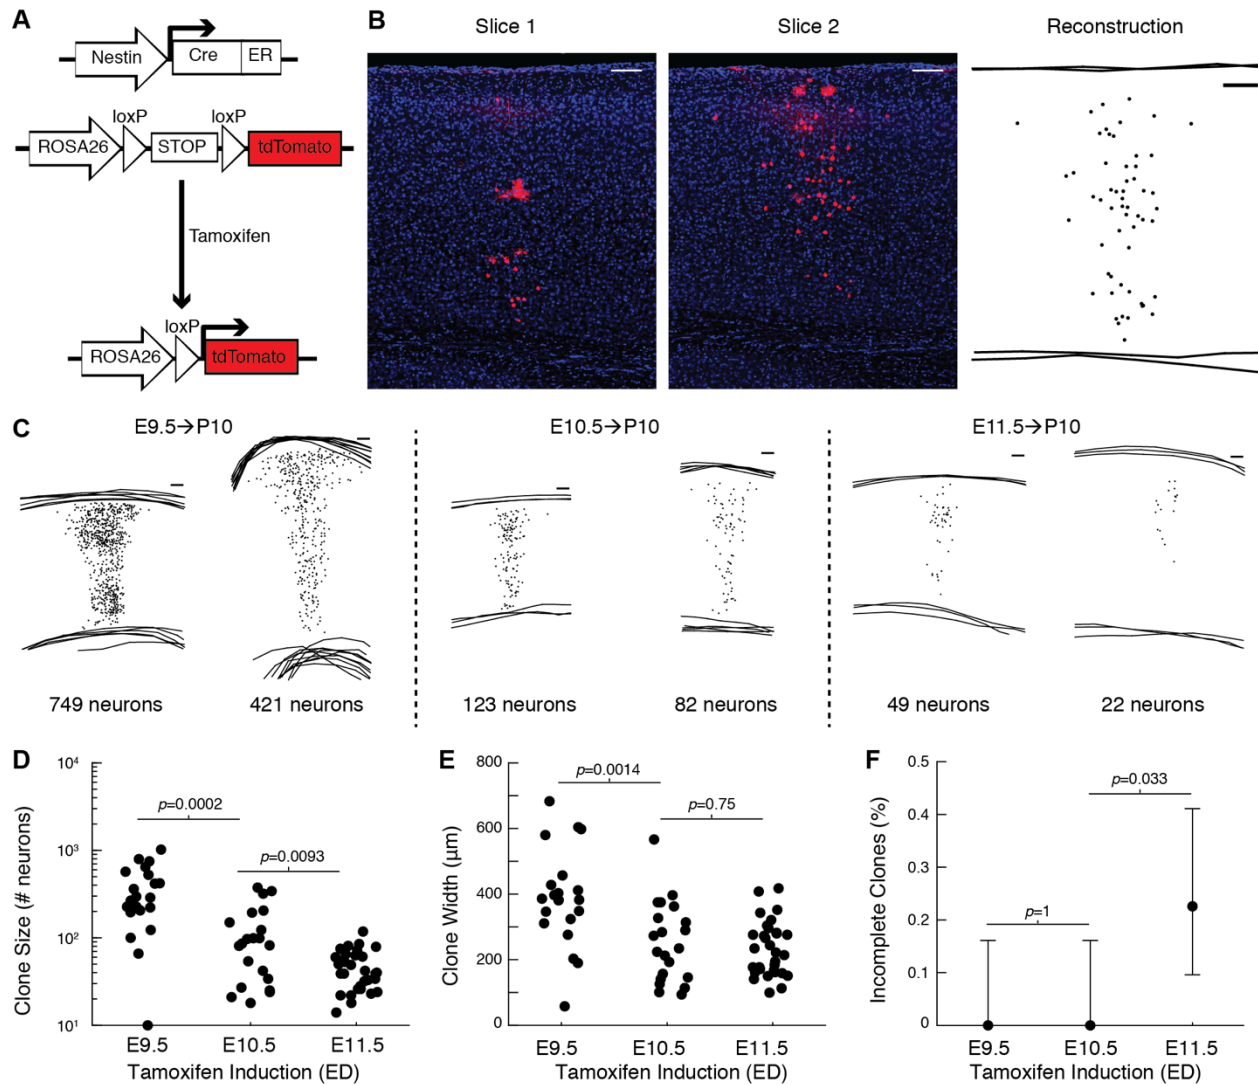

145

146 **Figure 1. Tamoxifen induction at E10.5 generates radial clones spanning superficial and deep cortical**

147 **layers. (A)** Schematic of tamoxifen-inducible Cre-loxP system for lineage tracing. **(B)** Manual

148 reconstruction of clone across multiple slices. In this example, larger red spots are morphologically

149 consistent with glial cells at high magnification. Scale bar: 100 μm. **(C)** Examples of reconstructed clones

150 labeled at E9.5, E10.5 or E11.5. Scale bar: 100 μm. **(D and E)** Number of neurons **(D)** and clone width **(E)**

151 at postnatal day 10 following tamoxifen induction at E9.5, E10.5, or E11.5 (n = 21, 21, and 31 clones; n = 2

152 mice per condition; *p*-values computed using Wilcoxon rank sum. **(F)** Percent of clones that are

153 incomplete (do not include L5–L6) following tamoxifen induction at E9.5, E10.5, or E11.5 (n=21, 21, and 31



154 clones;  $n = 2$  mice per condition;  $p$ -values computed using Fisher's exact test). Error bars show 95%  
155 Clopper-Pearson confidence intervals. See also Figure S1.

156 \_\_\_\_\_  
157 reasoned that E10.5 is the optimal time point to induce recombination in order to label  
158 radial clones spanning both superficial and deep cortical layers, and we used this  
159 induction protocol for all of our subsequent experiments.

160 *Transcriptomic variability of excitatory neurons is driven primarily by layer position*  
161 *and cortical region*

162 A recent transcriptomic cell atlas of adult mouse neocortex showed that primary visual  
163 (V1) and anterior lateral motor (ALM) cortices are composed of distinct transcriptomic  
164 excitatory neuron cell types (Tasic et al., 2018). Given that our lineage tracing strategy  
165 labels radial clones randomly across many cortical regions, we next asked whether  
166 region-specific excitatory neurons are present also in juvenile mice.

167 To test this, we cut acute parasagittal slices spanning primary visual (V1) and  
168 primary somatosensory (S1) cortices from juvenile (P15-P20) mice. Radial clones were  
169 identified by their intrinsic fluorescence (Figure 2A–B) and the contents of individual  
170 neurons were aspirated through a patch pipette following brief electrophysiological  
171 recording using our recently described Patch-seq protocol (Cadwell et al., 2017, Cadwell  
172 et al., 2016, Fuzik et al., 2016). We analyzed 206 neurons (after quality control, see  
173 Figure S2 and Methods) which had approximately 0.36 million uniquely mapping reads

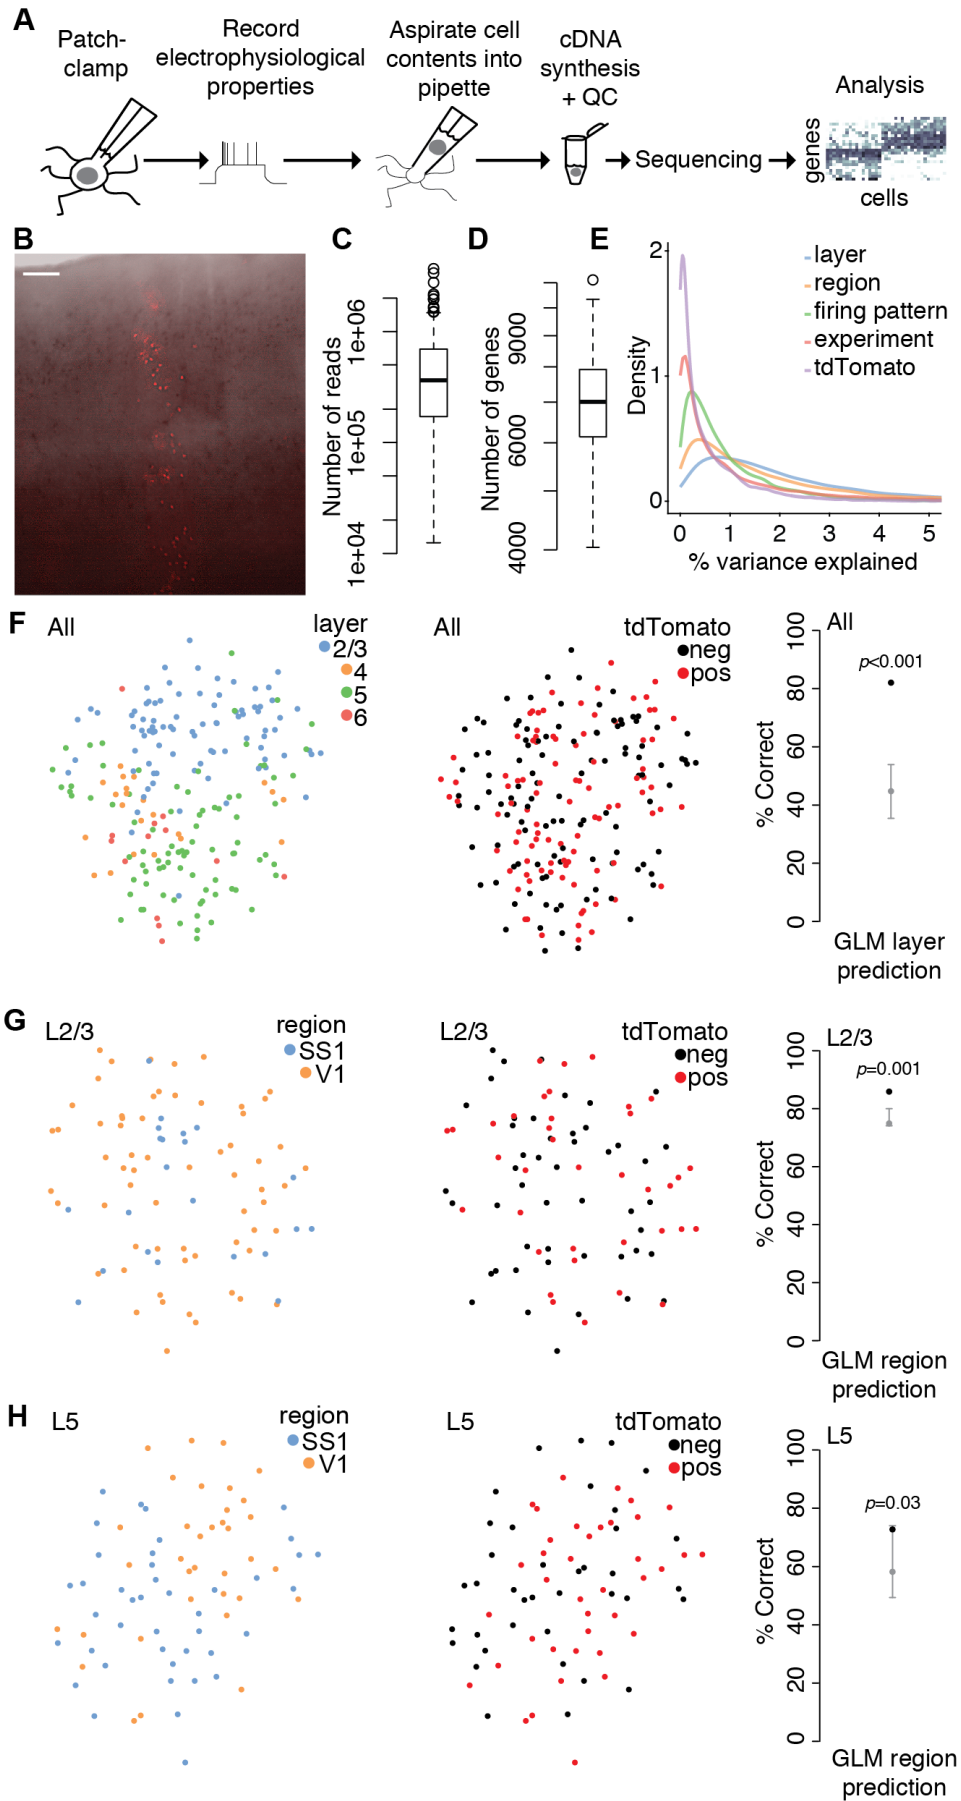

175 **Figure 2. Transcriptomic variability of excitatory neurons is driven primarily by layer position and**  
176 **cortical region. (A)** Overview of experimental approach using Patch-seq. **(B)** Example tdTomato-positive  
177 radial clone spanning superficial and deep cortical layers in an acute cortical slice used for Patch-seq  
178 experiments. Overlay of bright field and fluorescence image was performed in Adobe Photoshop. Scale  
179 bar: 100  $\mu\text{m}$ . **(C and D)** Box plots showing library size **(C)** and number of genes detected **(D)** for all cells  
180 passing quality control criteria (n=206). **(E)** Density plot of the percent of variance in normalized log-  
181 expression values explained by different experimental factors across genes (n=12,841 genes). **(F)** T-  
182 distributed stochastic neighbor embedding (t-SNE) plots using the top highly variable and correlated  
183 genes across all cells (n=91 genes; n=87, 22, 84, and 13 cells in layers 2/3, 4, 5, and 6, respectively), colored  
184 by layer position **(left)** or tdTomato expression **(middle)**. **(right)** Performance of a generalized linear  
185 model (GLM) trained to predict layer position from gene expression data (n=12,841 genes and 206 cells)  
186 with model performance (black dot) compared to the chance-level performance estimated using shuffled  
187 data (grey, mean and 95% coverage interval; shuffling layer). one-tailed *p*-value computed from shuffled  
188 data. **(G)** t-SNE plots using the top highly variable and correlated genes across L2/3 cells (n=43 genes;  
189 n=22 and 63 cells in SS1 and V1, respectively), colored by region **(left)** or tdTomato expression **(middle)**.  
190 **(right)** Performance of a GLM trained to predict region from gene expression data (n=12,841 genes and 85  
191 cells) as described in **F** but shuffling region instead of layer. **(H)** t-SNE plots using the top highly variable  
192 and correlated genes across L5 cells (n=41 genes; n=42 and 35 cells in SS1 and V1, respectively), colored by  
193 region **(left)** or tdTomato expression **(middle)**. **(right)** Performance of a GLM trained to predict region  
194 from gene expression data (n=12,841 genes and 77 cells) as described in **F** but shuffling region instead of  
195 layer. See also Figures S2 and S3 and Table S1.  
196  
197 (median; IQR 0.17–0.69 million reads; Figure 2C) and approximately 7000 genes  
198 detected (median: 7007; IQR 6152–7920 genes; Figure 2D). For all downstream analyses,

199 we used 12,841 genes that had on average >1 count/cell (see Methods). There were  
200 modest differences in the average library size (Figures S2E–F) and number of genes  
201 expressed (Figures S2I–J) between different cortical areas and between different layers.  
202 However, there were no significant differences between tdTomato-positive (clonally  
203 related) and tdTomato-negative (nearby unrelated) neurons in either of these two  
204 measures (Figures S2G and S2K). Count data were normalized using a pool-based  
205 strategy developed specifically for single-cell RNA sequencing analysis (Lun et al.,  
206 2016). Size factors largely correlated with library size (Figure S2H), suggesting that our  
207 cell population is relatively homogenous and that systematic differences in gene counts  
208 in our dataset are driven primarily by technical factors such as capture efficiency and  
209 sequencing depth. The normalized counts (Table S1) were used in all subsequent  
210 analyses.

211 Consistent with recent studies (Zeisel et al., 2015, Tasic et al., 2016, Tasic et al.,  
212 2018, Nowakowski et al., 2017), we found that layer position and cortical region were  
213 strong predictors of transcriptomic variability among excitatory neurons in our dataset  
214 (Figures 2E and S3). Dimensionality reduction using t-distributed stochastic neighbor  
215 embedding (t-SNE) revealed that neurons clustered primarily by layer position, and a  
216 cross-validated generalized linear model (GLM) could predict layer position from the  
217 gene expression data with approximately 80% accuracy (Figure 2F). Within L2/3 and L5,  
218 neurons from V1 and S1 seemed to form overlapping clusters but GLM prediction

219 accuracy was slightly better than chance (Figures 2G and 2H), suggesting that in  
220 juvenile mice, L2/3 and L5 excitatory neurons may have already started differentiating  
221 into region-specific transcriptomic classes.

222 *Radial clones are composed of diverse transcriptomic subtypes of excitatory neurons*  
223 *with no evidence of fate restriction*

224 While most evidence supports a deterministic model of excitatory neurogenesis,  
225 whereby individual progenitors give rise to many different excitatory neuron cell types  
226 through progressive fate restriction (Tan and Breen, 1993, Guo et al., 2013, Gao et al.,  
227 2014), other studies suggest that a subset of progenitors may be fate-restricted early on  
228 to give rise to layer-restricted excitatory neurons (Franco and Muller, 2013, Franco et al.,  
229 2012, Gil-Sanz et al., 2015, Llorca et al., 2018) and the relative contribution of the  
230 “common” and “multiple” progenitor models in generating excitatory neuron diversity  
231 remains controversial. Moreover, the transcriptomic diversity of clones of excitatory  
232 neurons is unknown, and one possibility is that individual radial clones may give rise to  
233 only a subset of the various cell types present within a given cortical layer; for example,  
234 some have proposed that up to one quarter of radial clones spanning L2-L6 may be  
235 composed exclusively of corticocortical projection neurons (Llorca et al., 2018).

236 To characterize the diversity of cell types within radial clones, we mapped our  
237 single-cell transcriptional profiles to a recently published cell type atlas of adult mouse  
238 cortex (Tasic et al., 2018). We found that labeled neurons within radial clones mapped to

239 all of the broad excitatory cell classes (Figures 3A and S4A, and Table S2) in proportions  
240 similar to the unlabeled control neurons (Figures 3B and S4B), suggesting that the  
241 *Nestin*-positive progenitors labeled using our lineage tracing protocol can give rise to  
242 the full range of excitatory neuronal cell types in the cortical areas examined. Area S1  
243 was not specifically profiled in the reference cell atlas; we found that cells from both V1  
244 and S1 in our dataset mapped predominantly to V1 excitatory neuron types (92.7% of  
245 all cells,  $n=191/206$ ; 94.0% of V1 cells,  $n=110/117$ ; 96.2% of S1 cells,  $n=76/79$ ; Table S2)  
246 with only a handful mapping to ALM excitatory neuron types (4.9% of all cells,  
247  $n=10/206$ ; 6.0% of V1 cells,  $n=7/117$ ; 3.8% of S1 cells,  $n=3/79$ ; Table S2). The quality of the  
248 mapping was equally good for V1 and S1 cells (mean uncertainty for S1 cells,  $5.8\pm 0.9$ ;  
249 mean uncertainty for V1 cells,  $5.0\pm 0.6$ ; mean  $\pm$  SE in arbitrary units (see Methods);  $p=0.44$ ,  
250 two-sample t-test), suggesting that the adult V1/ALM cell type atlas is an equally  
251 reasonable reference for excitatory neurons in juvenile V1 and S1. As a sanity check, we  
252 observed that most neurons patched in L2/3 mapped to L2/3 reference types (65/87,  
253 74.7%), and similarly for L4 (15/22, 68.2%), L5 (56/84, 66.7%), and L6 (11/13, 84.6%)  
254 (Figure 3A and Tables S1 and S2). The discrepancies were mostly due to some neurons  
255 mapping to a transcriptomic type from a neighboring layer: neurons from L2/3  
256 mapping to L4 types (8/87, 9.2%), neurons from L5 mapping to L4 types (5/84, 6.0%),  
257 and neurons from L5 mapping to L6 types (19/84, 22.6%).

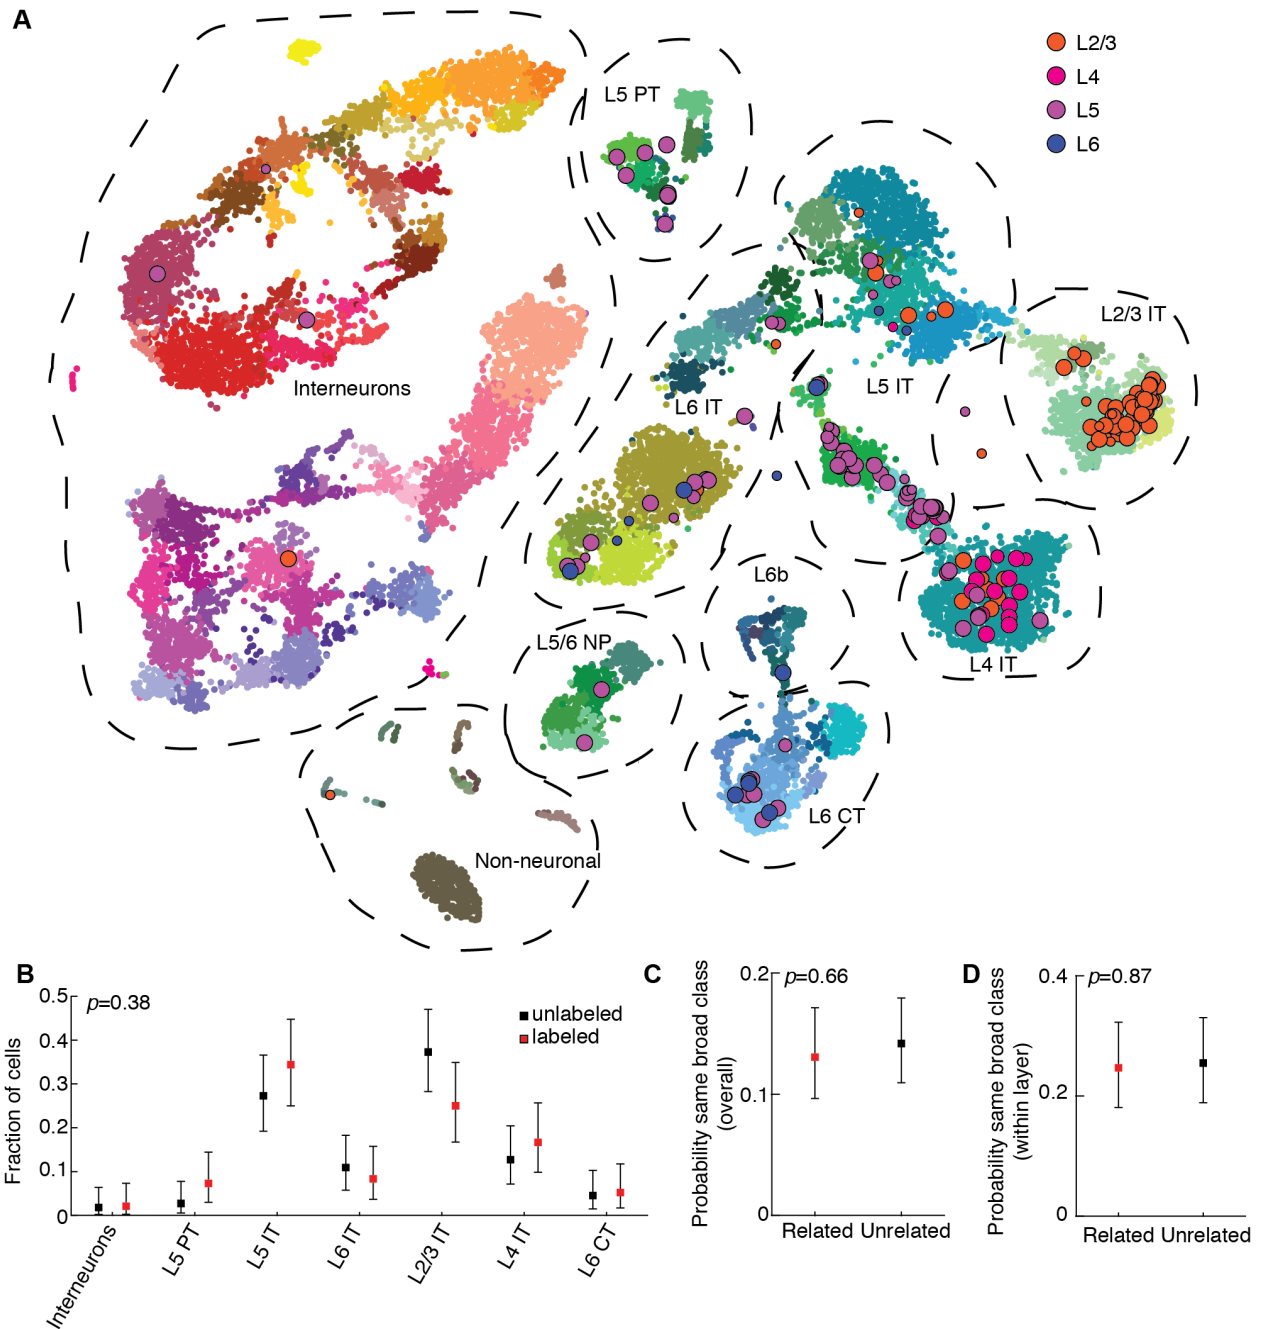

258

259 **Figure 3. Radial clones are composed of diverse transcriptomic subtypes of excitatory neurons with no**

260 **evidence of fate restriction. (A)** T-distributed stochastic neighbor embedding (t-SNE) plot showing

261 alignment of our Patch-seq data (data points with black outline, n=87, 22, 84, and 13 cells in layers 2/3, 4,

262 5, and 6 respectively) with a recently published mouse cell type atlas (data points with no outline;

263 n=23,822; from (Tasic et al., 2018); colors denote transcriptomic types and are taken from the original

264 publication). The t-SNE of the reference dataset and the positioning of Patch-seq cells were performed as  
265 described in (Kobak & Behrens, 2018), see Methods. The size of the Patch-seq data points denotes the  
266 precision of the mapping (see Methods): small points indicate high uncertainty. **(B)** Fraction of labeled  
267 (n=96) and unlabeled (n=110) cells that mapped to each of the broad cell classes outlined in **(A)** with  
268 greater than three Patch-seq cells total. **(C and D)** Probability of related and unrelated cell pairs mapping  
269 to the same broad cell class either overall (**C**; n=337 related pairs, n=409 unrelated pairs) or when  
270 conditioned on layer position (**D**; n=154 related pairs, n=157 unrelated pairs). For **(B–D)**, error bars are  
271 95% Clopper-Pearson confidence intervals and  $p$ -values are computed using Chi-squared test. See also  
272 Figures S4 and S5 and Table S2.

---

273  
274       Within individual radial clones, pairs of related neurons were no more likely to  
275 map to the same broad transcriptomic class (Figures 3C, 3D and S5), or specific cell type  
276 (Figures S4C, S4D, and S5) compared to pairs of unrelated neurons. Our results do not  
277 support the model that a subset of cortical radial glia are fate-restricted. Instead, our  
278 data is consistent with a “single progenitor” model of excitatory neurogenesis in which  
279 individual progenitors are capable of generating all of the diverse excitatory neuronal  
280 types within a given cortical region.

281 *Vertical, across-layer connections are selectively increased between excitatory neurons*  
282 *in radial clones*

283 To determine whether clonally related neurons within our radial clones were  
284 preferentially connected, we performed multiple simultaneous whole-cell recordings as  
285 previously described (Jiang et al., 2015), targeting up to eight neurons simultaneously



286 including both clonally related cells and nearby unlabeled control cells (Figures 4A and  
287 4B). In total, we patched 592 neurons (310 labeled and 282 unlabeled) from 86 clones in  
288 43 mice. The cells were distributed throughout L2/3 (n=275 cells), L4 (n=164 cells) and  
289 L5 (n=153 cells). To test connectivity, we injected brief current pulses into each patched  
290 neuron to elicit action potentials and monitored the responses of all other  
291 simultaneously recorded neurons to identify unitary excitatory postsynaptic currents  
292 (uEPSCs, Figure 4C). To confirm that the recorded cells were excitatory neurons, we  
293 analyzed the firing pattern of each cell in response to sustained depolarizing current  
294 and examined the morphology of each neuron using avidin-biotin-peroxidase staining  
295 (see Methods). In addition, we measured the inter-soma distances between all pairs of  
296 simultaneously recorded neurons. Cells that did not show definitive  
297 electrophysiological and/or morphological features of excitatory neurons (5.9%, 35/592)  
298 were excluded from further analysis. In total, we tested 2049 potential excitatory  
299 connections and identified 112 synaptic connections. The uEPSCs had a latency of  
300  $2.71 \pm 1.06$  ms (n=112 connections analyzed; mean $\pm$ SD), an amplitude of  $12.83 \pm 14.11$  pA  
301 (n = 112 connections analyzed, mean $\pm$ SD), and were blocked by bath application of  
302 glutamatergic antagonists CNQX (20  $\mu$ M) and APV (100  $\mu$ M; uEPSC amplitude =  
303  $10.5 \pm 5.4$  pA and  $0.0 \pm 0.0$  pA before and after the application of antagonists; median $\pm$ SE;  
304 n=15 connections tested,  $p=6 \times 10^{-5}$ , Wilcoxon signed-rank test), further confirming that  
305 these were excitatory connections.

306 To determine the effect of cell lineage on connection probability (P), we  
307 compared pairs consisting of two labeled cells within the same clone (i.e. “related”  
308 pairs) to pairs consisting of one labeled and one unlabeled cell (i.e. “unrelated” pairs).  
309 Pairs consisting of two unlabeled cells were not included as controls, since we could not  
310 be certain that those pairs are unrelated (they could be related, but their progenitor was  
311 not labeled). Overall, there was no evidence for a difference in connectivity between  
312 related and unrelated pairs (P=5.9% [42 out of 712 potential connections] and P=5.2% [70  
313 out of 1337] for related and unrelated pairs, respectively;  $p=0.54$ , Fisher’s exact test;  
314 Figure 4D). A single bidirectional connection was identified between related neurons  
315 (0.0031%, 1 out of 324 pairs in which both directions of connectivity were tested), and  
316 six were identified between unrelated neurons (0.0098%, 6 out of 612;  $p=0.43$ , Fisher’s  
317 exact test, Figure 4D).

318 However, when we considered only connections linking cells vertically, across  
319 layers, we found that connection probability was increased between related pairs  
320 compared to unrelated pairs (P=6.0% [28 out of 464] and P=2.7% [19 out of 711] for  
321 related and unrelated pairs, respectively;  $p=0.0056$ , Fisher’s exact test; Figure 4E),  
322 consistent with prior studies (Yu et al., 2009, Yu et al., 2012). A single vertical  
323 bidirectional connection was identified between related neurons (0.0047%, 1 out of 211  
324 vertical pairs in which both directions of connectivity were tested), and none were  
325 identified between unrelated neurons (0.0%, 0 out of 333;  $p=0.39$ , Fisher’s exact test;

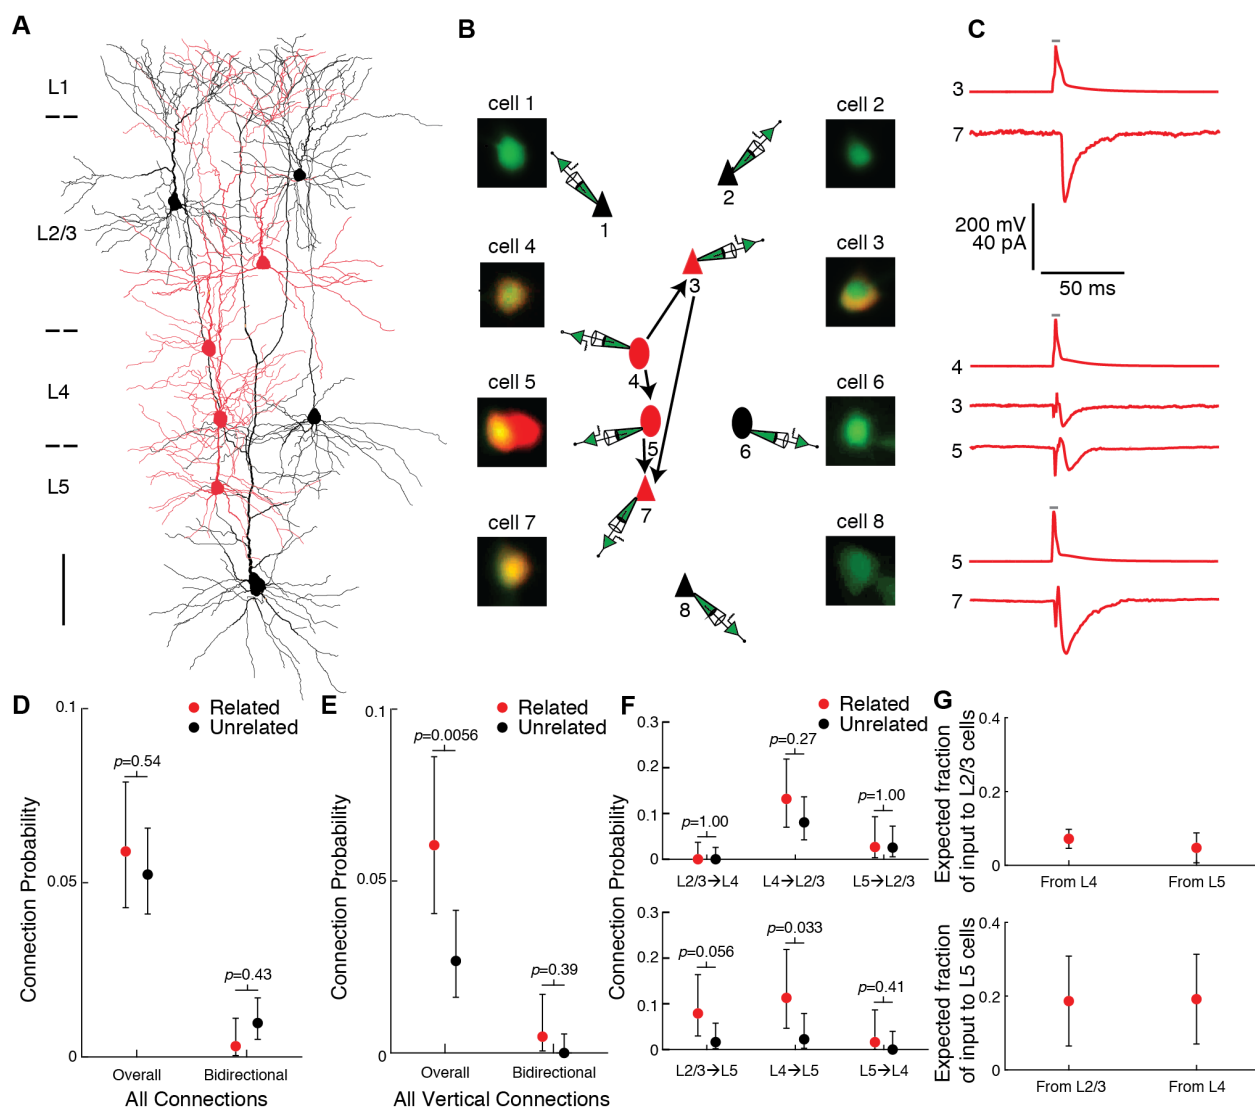

326

327 **Figure 4. Vertical, cross-layer connections are selectively increased between excitatory neurons in**

328 **radial clones. (A–C) Example recording session from four clonally related cells (red) and four nearby,**

329 **unrelated control cells (black). (A) Morphological reconstruction of all eight neurons. Scale bar, 100  $\mu$ m.**

330 **(B) Schematic of connections identified, as well as fluorescence images of each patched cell confirming**

331 **the overlap of red (lineage tracer) and green (pipette solution) in related cells and green only in control**

332 **cells. Triangles, pyramidal neurons; ovals, L4 excitatory neurons. (C) Presynaptic action potential (AP)**

333 **and postsynaptic uEPSC traces for each connection (average of at least 30 trials each). Grey bar indicates**

334 **period of depolarizing current injection to presynaptic neuron. (D) Connection probabilities among**

335 related and unrelated neurons, pooling all connections tested (n=712 potential connections and 324 pairs  
336 with both directions tested for related neurons; n=1337 potential connections and 612 pairs with both  
337 directions tested for unrelated neurons). **(E)** Connection probabilities among related and unrelated  
338 neurons, pooling all vertical, across-layer connections tested (n=464 potential connections and 211 pairs  
339 with both directions tested for related neurons; n=711 potential connections and 333 pairs with both  
340 directions tested for unrelated neurons). **(F)** Connection probabilities among related and unrelated  
341 neurons, for each vertical connection type tested (n=98, 91, 75, 76, 62, and 62 potential connections for  
342 related neurons and n=141, 149, 118, 123, 89, and 91 potential connections for unrelated neurons from  
343 L2/3 to L4, L4 to L2/3, L5 to L2/3, L2/3 to L5, L4 to L5, and L5 to L4, respectively). **(G)** Estimated fraction  
344 of vertical, across layer input to L2/3 cells (top panel) and L5 cells (bottom panel) coming from clonally  
345 related neurons based on our empirically measured clone sizes and connection probabilities. For **(D–F)**,  
346 error bars are 95% Clopper-Pearson confidence intervals and *p*-values are computed using Fisher’s exact  
347 test. For **(G)**, error bars are propagated standard error of the estimates (see Methods). See also Figures S7  
348 and S8.

349 \_\_\_\_\_  
350 Figure 4E). At the level of layer-specific connection types, we found that the connection  
351 probabilities from L4 to L5 (P=11.3% [7 out of 62] and P=2.3% [2 out of 89] for related  
352 and unrelated pairs, respectively; *p*=0.033, Fisher’s exact test; Figure 4F) and from L2/3  
353 to L5 (P=7.9% [6 out of 76] and P=1.6% [2 out of 123], for related and unrelated pairs  
354 respectively; *p*=0.056) were increased between related compared to unrelated pairs.

355 To estimate the contribution of clonally related neurons as a fraction of the total  
356 input a cell receives, we used a simple quantitative model of connectivity based on our

357 empirically measured connection probabilities and clone sizes. Briefly, we modeled the  
358 number of input connections to a particular cell from both related and unrelated cells in  
359 different layers of a cortical column as a binomial distribution with the connection  
360 probabilities set to the empirically measured connection probabilities (see Methods for  
361 additional assumptions). In particular, we wondered whether specific layer-defined  
362 connection types would show a substantial fraction of input from clonally related cells.  
363 Using our empirically measured connection probabilities and clone size (86 neurons on  
364 average), the model estimates that a substantial fraction of inputs from L4 to L2/3, L4 to  
365 L5, and L2/3 to L5 originates from cells with a common developmental lineage  
366 ( $7.2 \pm 2.6\%$  of L4→L2/3 connections,  $19.2 \pm 12.2\%$  of L4→L5 connections, and  $18.6 \pm 12.2\%$  of  
367 L2/3→L5 connections; estimate±SE, Figure 4G). These findings suggest that cell lineage  
368 may play an important role in shaping specific vertical, across-layer connections.

369 *Lateral, within-layer connections are not increased between excitatory neurons in*  
370 *radial clones*

371 In contrast to vertical connections, we did not find evidence for an increase in the  
372 number of lateral connections within the same cortical layer between related neurons  
373 compared to unrelated neurons ( $P=5.7\%$  [14 out of 248 potential connections] and  
374  $P=8.2\%$  [51 out of 626 potential connections] for related and unrelated pairs,  
375 respectively;  $p=0.25$ , Fisher's exact test; Figures 5A–C). There was also no statistically  
376 significant difference in bidirectional lateral connections between related and unrelated

377 pairs (0%, 0 out of 113 related lateral pairs in which both directions of connectivity were  
378 tested; 2.1%, 6 out of 284 unrelated lateral pairs in which both directions of connectivity  
379 were tested;  $p=0.19$ , Fisher's exact test; Figure 5C). If anything, related neurons were  
380 more rarely connected to each other within L2/3 or within L5 ( $P=1.9%$  [2 out of 105  
381 potential connections] and  $P=2.3%$  [1 out of 43 potential connections] for related pairs  
382 within L2/3 and L5, respectively) compared to unrelated pairs ( $P=5.9%$  [20 out of 342  
383 potential connections] and  $P=10.3%$  [14 out of 136 potential connections] for unrelated  
384 pairs within L2/3 and L5, respectively) although the differences were not statistically  
385 significant ( $p=0.13$  and  $p=0.12$  for L2/3 and L5, respectively, Fisher's exact test; Figure  
386 5D). Our connectivity model estimates that only a small fraction of lateral, within-layer  
387 input to a cell comes from related neurons ( $1.5\pm 1.1%$  of connections within L2/3,  
388  $4.3\pm 1.5%$  of connections within L4, and  $1.1\pm 1.1%$  of connections within L5; estimate $\pm$ SE;  
389 Figure 5E). Overall, these data suggest a revised model of circuit assembly among  
390 clonally related excitatory neurons in which related cells are preferentially connected  
391 vertically, across cortical layers, but not within a layer (Figure 5F).

392         Since connection probability also depends on the distance between cells (Perin et  
393 al., 2011, Ko et al., 2011), and potentially on cortical area, we performed additional  
394 analyses in order to take these variables into account. First, for each pair of clonally  
395 related neurons we identified a set of matched control pairs with the same pre- and  
396 post-synaptic layers and with the same (up to 20  $\mu\text{m}$  difference) tangential and vertical

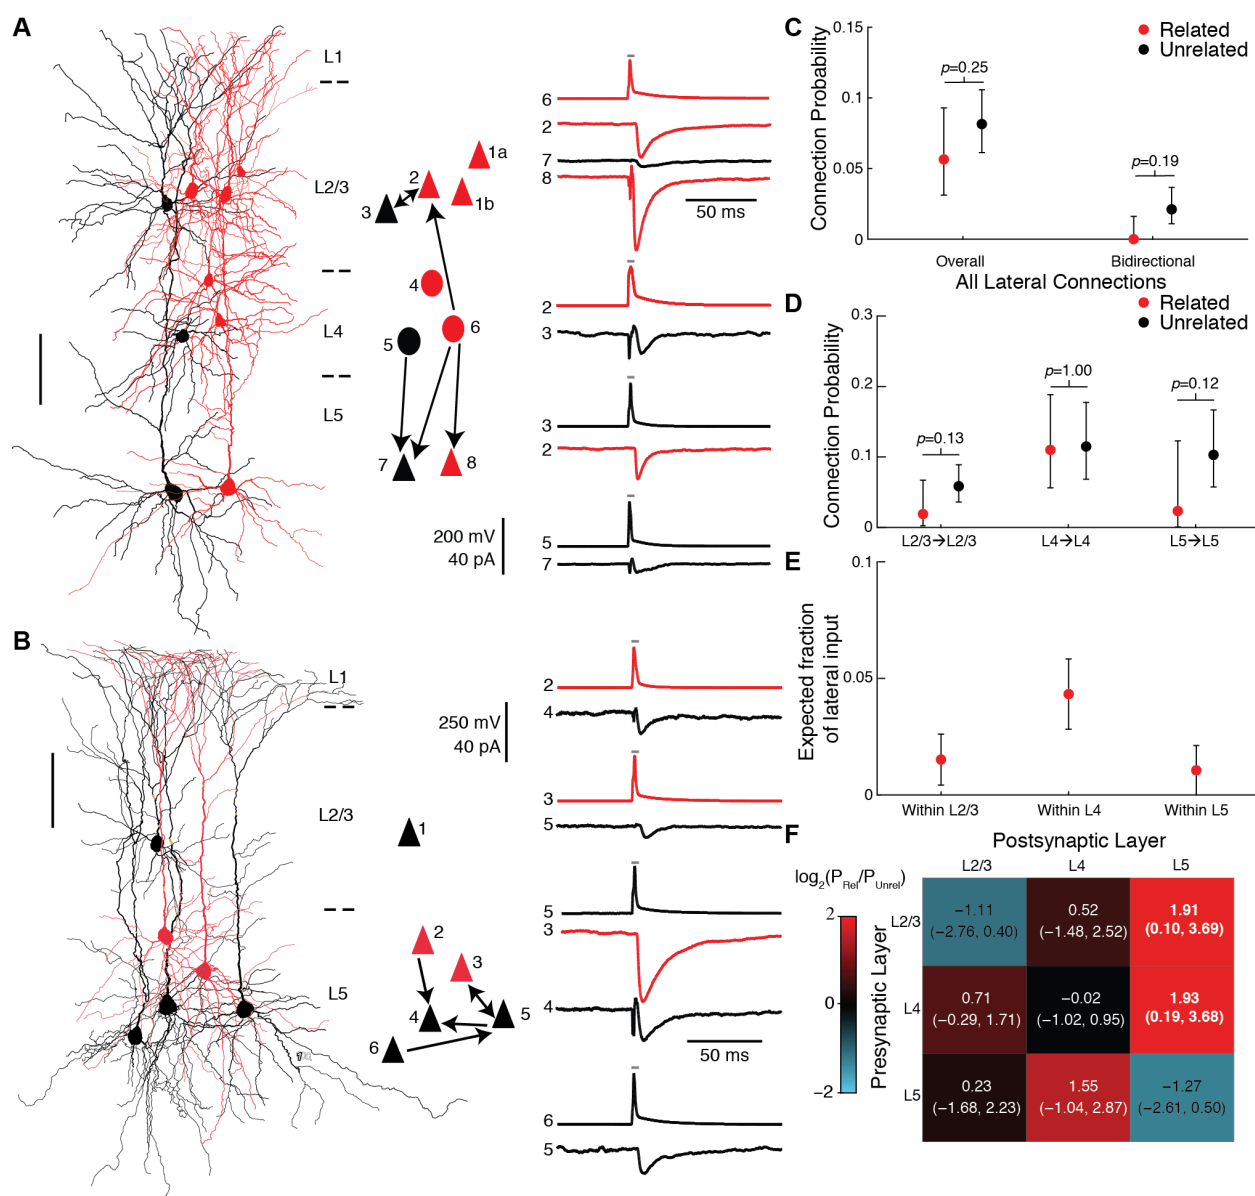

397

398 **Figure 5. Lateral, within-layer connections are not increased between excitatory neurons in radial**

399 clones. (A and B) Example recording sessions testing within-layer connections among clonally related  
400 cells (red) and nearby, unrelated control cells (black) within L2/3 (A) and L5 (B). Scale bars, 100  $\mu\text{m}$ .

401 Triangles, pyramidal neurons; ovals, L4 excitatory neurons. Presynaptic action potential (AP) and  
402 postsynaptic uEPSC traces for each connection are an average of at least 20 trials each. Grey bar indicates

403 period of depolarizing current injection to presynaptic neuron. (C) Connection probabilities among

404 related and unrelated neurons, pooling all lateral, within-layer connections tested (n=248 potential

405 connections and 113 pairs with both directions tested for related neurons; n=626 potential connections  
406 and 284 pairs with both directions tested for unrelated neurons). **(D)** Connection probabilities among  
407 related and unrelated neurons, for each lateral connection type tested (n=105, 100, and 43 potential  
408 connections for related neurons and n=342, 148, and 136 potential connections for unrelated neurons  
409 within L2/3, L4, and L5, respectively). **(E)** Estimated fraction of lateral inputs to a single cell within L2/3,  
410 L4, or L5 that comes from clonally related neurons based on our empirically measured clone sizes and  
411 connection probabilities. **(F)** Heatmap of the log ratio of the connection probabilities for related and  
412 unrelated neurons, with additive smoothing ( $\epsilon=1$ ) by connection type tested. For **(C-D)**, error bars are  
413 95% Clopper-Pearson confidence intervals and *p*-values are computed using Fisher's exact test. For **(E)**,  
414 error bars are propagated standard error of the estimates (see Methods) For **(F)**, the 95% confidence  
415 interval, in parentheses below the value, is computed by resampling; significant values are highlighted in  
416 bold. See also Figures S7 and S8.

417 \_\_\_\_\_

418 distances between the cells. We compared connectivity rates between related pairs and  
419 distance-matched control pairs using bootstrapping (see Methods). We found similar  
420 results as described above, with increased vertical connection probability between  
421 related neurons and no evidence for a difference in lateral connection probability  
422 (Figure S6). Second, we sorted the data into two groups according to the rostro-caudal  
423 position of each clone, which revealed similar changes in connectivity between related  
424 and unrelated neurons in both groups (Figure S7). Third, we built a generalized linear  
425 model of connection probability depending on the cell lineage (related or unrelated),  
426 connection type (vertical or lateral), Euclidean distance between cells and rostro-caudal



427 position as predictors (see Methods and Table S3). The model revealed a significant  
428 interaction between cell lineage and connection type ( $p=0.035$ ), further supporting that  
429 the effect of cell lineage on connectivity depends on the type of connection tested. The  
430 model also revealed a weak decrease in connection probability with Euclidean distance  
431 for lateral connections ( $p=0.056$ ) and no evidence for any influence of rostro-caudal  
432 position ( $p>0.5$  for the main effect and all interactions).

## 433 **Discussion**

434 In summary, we show that radial clones in the mouse neocortex are composed of a  
435 diverse ensemble of excitatory neurons that are more likely to be synaptically connected  
436 by vertical connections across cortical layers, but not by lateral connections within a  
437 cortical layer. These findings carry important implications regarding the developmental  
438 mechanisms of circuit assembly in the neocortex and suggest that integration of vertical  
439 input from related neurons with lateral input from unrelated neurons may represent a  
440 fundamental principle of cortical information processing that is initially established by  
441 hardwired developmental programs.

### 442 *Cell type composition of radial clones*

443 All of the radial clones labeled at E10.5 or earlier in our study spanned both superficial  
444 and deep layers of the cortex, consistent with prior studies labeling progenitors at this  
445 early developmental stage (Tan et al., 1998). Some groups have reported upper layer  
446 fate-restriction among a subset of radial glia when labeling progenitors at E10.5 (Franco

447 et al., 2012, Franco and Muller, 2013, Gil-Sanz et al., 2015) using the *Cux2*-CreER driver  
448 line but not the Nestin-CreER line (Franco et al., 2012). It is possible that *Cux2*-CreER  
449 labels a small subset of radial glia that exhibit this neurogenesis pattern, or that the  
450 progenitor pool labeled using our *Nestin*-CreER driver is distinct from the *Cux2*-CreER-  
451 positive fraction. Given the low doses of tamoxifen administered in our study, we may  
452 be biased to labeling progenitors with the highest expression of *Nes* at E10.5, most likely  
453 ventricular radial glial cells (Hockfield and McKay, 1985), but potentially some  
454 symmetrically dividing neuroepithelial stem cells as well, which express low levels of  
455 Nestin in their pial end feet (Misson et al., 1988). It is also possible that the upper layer  
456 fate-restricted progenitors present at early time points, such as intermediate progenitors  
457 (Mihalas & Hevner, 2018), collectively generate all the different excitatory neuron  
458 subtypes within a given cortical region in parallel with the translaminal clones labeled  
459 in our study, which could explain why we saw no difference in the overall distribution  
460 of cell types between our labeled clones and randomly selected unlabeled excitatory  
461 neurons. Interestingly, the only transcriptomic subtype that appeared relatively  
462 underrepresented in our clones was a subset of L2/3 intratelencephalic neurons (L2/3 IT  
463 VISp Rrad; Figure S4B), but this difference was not statistically significant after  
464 correction for multiple comparisons. Further work is needed to determine whether this  
465 particular subtype of L2/3 neurons may arise primarily from *Cux2*-positive or other  
466 progenitors.

467           As this manuscript was being prepared, a preprint was published (Llorca et al.,  
468 2018) suggesting that individual translaminar clones are composed of restricted  
469 subtypes of excitatory neurons; in particular, they report approximately 10% of clones  
470 restricted to either the superficial or deep layers, and nearly a quarter of their  
471 translaminar clones were composed exclusively of corticocortical projection neurons.  
472 Two differences may explain this discrepancy. First, that study used a different Cre  
473 driver line (*Emx1-CreERT2*) which may target a different progenitor pool than the one  
474 described in our study. Second, their clones were labeled at a later developmental stage  
475 (E12.5), raising the possibility that their layer-restricted clones represent subclones that,  
476 if labeled earlier in neurogenesis, would give rise to clones spanning both superficial  
477 and deep layers and containing a mixture of cell types. Consistent with this  
478 interpretation, we saw that approximately one quarter of our clones were restricted to  
479 superficial layers when labeled at E11.5, but we never saw this upper-layer restriction  
480 when labeling at E9.5 or E10.5.

481           Recent single-cell RNA-sequencing studies have shown that excitatory neuron  
482 cell types are largely region-specific, at least between V1 and ALM (Tasic et al., 2018).  
483 Here we profiled the transcriptomes of cells from two primary sensory areas, V1 and S1,  
484 and found that the vast majority of cells from both regions map to V1-specific  
485 transcriptomic cell types rather than ALM-specific transcriptomic cell types, suggesting  
486 that cell types in different primary sensory areas are more similar to each other than

487 they are to cell types in motor cortex. Interestingly, we still observed region-specific  
488 differences in gene expression between V1 and S1, suggesting that these two cortical  
489 areas are likely composed of distinct excitatory neuron types as well. While there was  
490 no evidence to suggest that the quality of our mapping to the V1/ALM reference dataset  
491 was worse for S1 cell than for V1 cells, if a reference atlas for S1 becomes available in the  
492 future it would be interesting to re-examine our data to better understand the  
493 developmental timeline of area-specific gene expression signatures in these two  
494 primary sensory areas.

#### 495 *Connectivity matrix of radial clones*

496 We find that excitatory neurons in radial clones are more likely to be synaptically  
497 connected vertically, across cortical layers, but not laterally, within the same cortical  
498 layer. While it has been previously reported that clonally related excitatory neurons are  
499 more likely to be synaptically connected (Yu et al., 2009, Yu et al., 2012, He et al., 2015),  
500 these prior studies did not tease out the effect of shared lineage on different types of  
501 layer-defined connections and, in particular, did not report any results for within-layer  
502 connections between clonally related neurons. Thus, our findings provide a higher  
503 resolution model of how cell lineage shapes developing cortical circuits.

504 A more recent study using chimeric mice with fluorescently labeled induced  
505 pluripotent stem cells (iPSCs) injected into blastocysts at E3.5 has examined lateral  
506 connections between related cells within L4 and found a transient increase in synaptic

507 connectivity at P13-P16, which is followed by an increase in the fraction of connections  
508 that are reciprocal, rather than one-way, at P18-P20 (Tarusawa et al., 2016). We did not  
509 find any evidence for an increase in either overall connectivity or bidirectional  
510 connectivity in our data; however, it is possible that if the increase in connectivity in L4  
511 is transient and only present from P13-P16 for overall connectivity and from P18-P20 for  
512 bidirectional connectivity that we may have missed it, as our data span the space  
513 between these time windows from P15-P20. Another possibility is that the iPSC-derived  
514 neurons may have altered synaptogenesis due to chromosomal instability and altered  
515 gene expression programs of iPSCs (Mayshar et al., 2010). Additional experiments to  
516 explore the possibility of a transient increase in lateral connections that include a direct  
517 comparison between iPSC-derived clones and clones labeled using other methods may  
518 ultimately resolve these questions.

519       Our finding that clonally related neurons are only rarely connected by lateral  
520 connections within L2/3 is particularly unexpected given prior studies showing more  
521 similar feature selectivity between clonally related neurons in this layer (Li et al., 2012),  
522 even in very large clones (Ohtsuki et al., 2012). Several studies have now shown that,  
523 within L2/3, excitatory neurons that have similar orientation tuning are more likely to  
524 be synaptically connected and have stronger synapses compared to cells with dissimilar  
525 tuning preferences (Ko et al., 2011, Cossell et al., 2015). Thus, the expectation and  
526 proposed model (Li et al., 2018) would be that increased connections between clonally

527 related neurons within L2/3 underlies their similarity in tuning. However, we found no  
528 evidence for an increase in lateral connections between related cells in L2/3, suggesting  
529 that they may inherit similar feature selectivity either by receiving common  
530 feedforward inputs from L4 or by modulation from long-range feedback connections.  
531 Moreover, these results suggest a novel functional role for lateral connections within  
532 L2/3 in permitting synapse formation between cells in unrelated clonal units, in  
533 addition to linking cells with similar tuning preferences.

534 Our results highlight L5 as a potential hub within radial clones, with the most  
535 striking increases in connectivity seen in the projections from superficial layers to L5.  
536 Neurons in L5 serve as a major output of the cortex with important roles in integrating  
537 feedback from higher cortical areas and in top-down modulation by brain states (Kim et  
538 al., 2015) and altered gene expression in deep layer neurons during midfetal  
539 development has been recently implicated in neuropsychiatric disorders such as autism  
540 (Willsey et al., 2013). We propose that integration of translaminar input from clonally  
541 related neurons with intralaminar input from unrelated neurons in L5 may represent an  
542 organizing principle for lineage-dependent circuit assembly. While L5 has traditionally  
543 been less amenable to in vivo functional studies, recent advances in calcium imaging  
544 such as three-photon microscopy and genetically encoded calcium indicators  
545 (Ouzounov et al., 2017) may enable functional analysis of cortical computation in both  
546 superficial and deep layers of radial clones. Future studies aimed at dissecting the

547 functional role of lineage-driven synaptic connectivity across the cortical column may  
548 provide mechanistic insight into abnormal circuit function in neuropsychiatric disease.

549         The mechanism by which radial clones of excitatory neurons form specific  
550 connections is thought to involve gap junction coupling during migration along the  
551 radial glial fiber (Yu et al., 2012). A recent study has further shown that it is the  
552 coupling between clonally related neurons, and not between the postmitotic neurons  
553 and their radial glia or progenitors, that promotes specific synapse formation between  
554 radially aligned sister neurons (He et al., 2015). This coupling requires the inside-out  
555 migration of related neurons along a similar path and is abolished by removal of  
556 REELIN or its downstream effector DAB1 which disrupt inside-out migration, or by  
557 increased levels of EFNA/EPHA-mediated signaling which leads to increased lateral  
558 displacement of clonally related neurons as they traverse the intermediate zone prior to  
559 reaching the cortical plate (Torii et al., 2009, He et al., 2015). Interestingly, early studies  
560 suggested that migration along multiple radial glial fibers may be common within  
561 radial clones (Walsh and Cepko, 1988) and underlie the substantial tangential  
562 dispersion seen within radial clones. Our finding that connections from L2/3 to L5 and  
563 from L4 to L5 are specifically enhanced between clonally related neurons could be  
564 consistent with a mechanism that requires inside-out migration along a radial glial fiber  
565 and further suggests that as migrating neurons travel to reach the superficial layers,  
566 their axons may “stick” to the maturing apical dendrites of clonally related deep layer

567 neurons they are passing. However, we did not see any difference in connectivity  
568 between related neurons based on their tangential displacement (data not shown), as  
569 might be expected if radial migration along the same glial fiber is necessary for  
570 formation of specific synapses. The possibility that clonally related neurons may either  
571 establish specific vertical connections regardless of which radial glial fiber they follow,  
572 for example by expression of specific cell adhesion molecules during migration  
573 (Tarusawa et al., 2016), or undergo significant tangential migration *after* passing deep  
574 layer neurons may warrant further investigation.

575         It is nearly impossible to prove that an effect is absent, and with additional  
576 sampling of lateral connections, particularly in L4 as discussed above, it is possible that  
577 a difference in connectivity may emerge. However, our data suggest that any effect of  
578 lineage on lateral connectivity must be very small and, based on the trend seen in our  
579 data within L2/3 and within L5, may actually be in the opposite direction with fewer  
580 connections between clonally related neurons than between unrelated pairs. One  
581 possible explanation for this is that any two clonal related neurons in the same layer  
582 could be generated by a symmetrically dividing intermediate progenitor cell, but not  
583 radial glia, and it is theoretically possible that progenitor cell type of origin could  
584 influence development of local cortical microcircuit. Another possibility is that any two  
585 neurons in the same layer were generated by two different radial glia, which shared a  
586 common symmetrically dividing radial glia ancestor labelled at E10.5. Future studies



587 utilizing temporally resolved lineage tracing methods (McKenna et al., 2016) could  
588 provide further insights into how the degree of relatedness impacts intra-clonal  
589 connectivity.

590 Similarly, since we focused on V1 and S1, both primary sensory areas, it is  
591 possible that a different pattern of connectivity among clonally related neurons is  
592 present in other cortical areas such as primary motor cortex. We also tested only on  
593 local connections that can be tested in an acute slice preparation. Given that  
594 transcriptomic cell type correlates with the long-range projection pattern of excitatory  
595 neurons (Tasic et al., 2018), our finding that individual clones contain multiple diverse  
596 transcriptomic types suggests that neurons within radial clones might also project to  
597 diverse targets. Additional experiments using different methods for lineage tracing and  
598 connectivity profiling, focusing on different brain regions and using adult animals, will  
599 be necessary to determine the generalizability of the connectivity pattern we describe  
600 here and delineate the long-range inputs and outputs of individual radial clones.  
601 However, our data suggest that the integration of feedforward, intra-columnar input  
602 with lateral, inter-columnar information may represent a developmentally programmed  
603 connectivity motif for the assembly of neocortical circuits.

## 604 **Acknowledgements**

605 We thank members of the Tolias and Sandberg labs including Alexander Ecker, Jacob  
606 Reimer, Dimitri Yatsenko, Shan Shen, Emmanouil Froudarakis, Amy Morgan, Camila

607 Lopez, Megan Rech, Shannon McDonnell, and Leonard Hartmanis for helpful  
608 discussions and technical support, and Tomasz Nowakowski for critical reading of the  
609 manuscript. This project was supported by the Optical Imaging and Vital Microscopy  
610 core at Baylor College of Medicine; grants R01MH103108, R01DA028525, DP1EY023176,  
611 P30EY002520, T32EY07001, and DP1OD008301 from the National Institutes of Health  
612 (NIH) to A.S.T.; grants from the Swedish Research Council and the Vallee Foundation  
613 to R. S.; grants from the Deutsche Forschungsgemeinschaft (DFG, EXC 2064, BE5601/4-  
614 1) and the German Federal Ministry of Education and Research (BMBF; FKZ 01GQ1601)  
615 to P.B.; the McKnight Scholar Award to A.S.T.; and the Arnold and Mabel Beckman  
616 Foundation Young Investigator Award to A.S.T. X. J. was supported by BCM Faculty  
617 Start-up Fund. C.R.C was supported by NIH grants F30MH095440, T32GM007330 and  
618 T32EB006350. P.G.F. was supported by NIH grant F30MH112312. C.R.C and P.G.F.  
619 were both supported by the Baylor Research Advocates for Student Scientists (BRASS)  
620 foundation.

621 This project was also supported by the Intelligence Advanced Research Projects  
622 Activity (IARPA) via Department of Interior/Interior Business Center (DoI/IBC) contract  
623 number D16PC00003. The U.S. Government is authorized to reproduce and distribute  
624 reprints for Governmental purposes notwithstanding any copyright annotation thereon.  
625 Disclaimer: The views and conclusions contained herein are those of the authors and

626 should not be interpreted as necessarily representing the official policies or  
627 endorsements, either expressed or implied, of IARPA, DoI/IBC, or the U.S. Government.

628 This project was also supported by the National Institute of Mental Health and  
629 the National Institute of Neurological Disorders and Stroke under Award Number  
630 U19MH114830. The content is solely the responsibility of the authors and does not  
631 necessarily represent the official views of the National Institutes of Health.

## 632 **Author Contributions**

633 C.R.C. and P.G.F. generated mice with labeled clones. X.J., F.S. and S.L. performed  
634 electrophysiological recordings for Patch-seq experiments. C.R.C. and F.S. amplified  
635 full-length cDNA from patched cells. C.R.C. generated sequencing libraries and  
636 performed pre-processing of the sequencing data with assistance from P.J. X.J. and F.S.  
637 performed the multi-patching experiments. C.R.C. performed quantitative analysis of  
638 clones and analyzed Patch-seq data with input from D.K. D.K. mapped Patch-seq cells  
639 to the reference dataset and performed joint t-SNE projections. C.R.C., X.J., and F.S.  
640 analyzed the connectivity data with input from D.K. and R.J.C. F.H.S. implemented the  
641 connectivity model. R.S. supervised the library preparation, sequencing, and pre-  
642 processing of sequencing data. P.B. supervised all data analysis. X.J. supervised the  
643 multi-patching and Patch-seq experiments. A.S.T. supervised all experiments and  
644 analyses. C.R.C. drafted the manuscript with input from all co-authors.

645 **Declaration of Interests**

646 The authors declare no competing interests.

647 **References**

648 ANGEVINE, J. B., JR. & SIDMAN, R. L. 1961. Autoradiographic study of cell migration  
649 during histogenesis of cerebral cortex in the mouse. *Nature*, 192, 766-8.

650 ASCOLI GA, ALONSO-NANCLARES L, ANDERSON SA, BARRIONUEVO G,  
651 BENAVIDES-PICCIONE R, BURKHALTER A, BUZSÁKI G, CAULI B,  
652 DEFELIPE J, FAIRÉN A, ET AL. 2008. Petilla terminology: nomenclature of  
653 features of GABAergic interneurons of the cerebral cortex. *Nat Rev Neurosci*, 9,  
654 557-68.

655 BARTH, L., BURKHALTER, A., CALLAWAY, E. M., CONNORS, B. W., CAULI, B.,  
656 DEFELIPE, J., FELDMEYER, D., FREUND, T., KAWAGUCHI, Y., KISVARDAY,  
657 Z. et al. 2016. Comment on "Principles of connectivity among morphologically  
658 defined cell types in adult neocortex." *Science*, 353:1108, aaf5663.

659 BUXHOEVEDEN, D. P. & CASANOVA, M. F. 2002. The minicolumn hypothesis in  
660 neuroscience. *Brain*, 125, 935-51.

661 CADWELL, C. R., PALASANTZA, A., JIANG, X., BERENS, P., DENG, Q., YILMAZ, M.,  
662 REIMER, J., SHEN, S., BETHGE, M., TOLIAS, K. F., SANDBERG, R. & TOLIAS,

663 A. S. 2016. Electrophysiological, transcriptomic and morphologic profiling of  
664 single neurons using Patch-seq. *Nat Biotechnol*, 34, 199-203.

665 CADWELL, C. R., SCALA, F., LI, S., LIVRIZZI, G., SHEN, S., SANDBERG, R., JIANG,  
666 X. & TOLIAS, A. S. 2017. Multimodal profiling of single-cell morphology,  
667 electrophysiology, and gene expression using Patch-seq. *Nat Protoc*, 12, 2531-  
668 2553.

669 CAVINESS, V. S., JR., TAKAHASHI, T. & NOWAKOWSKI, R. S. 1995. Numbers, time  
670 and neocortical neuronogenesis: a general developmental and evolutionary  
671 model. *Trends Neurosci*, 18, 379-83.

672 CONNORS, B. W. & GUTNICK, M. J. 1990. Intrinsic firing patterns of diverse  
673 neocortical neurons. *Trends Neurosci*, 13, 99-104.

674 COSSELL, L., IACARUSO, M. F., MUIR, D. R., HOULTON, R., SADER, E. N., KO., H.,  
675 HOFER, S. B. & MRSIC-FLOGEL, T. D. 2015. Functional organization of  
676 excitatory synaptic strength in primary visual cortex. *Nature*, 518, 399-403.

677 ECKLER, M. J., NGUYEN, T. D., MCKENNA, W. L., FASTOW, B. L., GUO, C.,  
678 RUBENSTEIN, J. L. R. & CHEN, B. 2015. Cux2-positive radial glial cells generate  
679 diverse subtypes of neocortical projection neurons and macroglia. *Neuron*, 86,  
680 1100-1108

681 FELDMEYER, D. 2012. Excitatory neuronal connectivity in the barrel cortex. *Front*  
682 *Neuroanat*, 6, 24.

- 683 FRANCO, S. J., GIL-SANZ, C., MARTINEZ-GARAY, I., ESPINOSA, A., HARKINS-  
684 PERRY, S. R., RAMOS, C. & MULLER, U. 2012. Fate-restricted neural progenitors  
685 in the mammalian cerebral cortex. *Science*, 337, 746-9.
- 686 FRANCO, S. J. & MULLER, U. 2013. Shaping our minds: stem and progenitor cell  
687 diversity in the mammalian neocortex. *Neuron*, 77, 19-34.
- 688 FUZIK, J., ZEISEL, A., MATE, Z., CALVIGIONI, D., YANAGAWA, Y., SZABO, G.,  
689 LINNARSSON, S. & HARKANY, T. 2016. Integration of electrophysiological  
690 recordings with single-cell RNA-seq data identified neuronal subtypes. *Nat*  
691 *Biotechnol*, 34, 175-83.
- 692 GAO, P., POSTIGLIONE, M. P., KRIEGER, T. G., HERNANDEZ, L., WANG, C., HAN,  
693 Z., STREICHER, C., PAPUSHEVA, E., INSOLERA, R., CHUGH, K., KODISH, O.,  
694 HUANG, K., SIMONS, B. D., LUO, L., HIPPENMEYER, S. & SHI, S. H. 2014.  
695 Deterministic progenitor behavior and unitary production of neurons in the  
696 neocortex. *Cell*, 159, 775-88.
- 697 GIL-SANZ, C., ESPINOSA, A., FREGOSO, S. P., BLUSKE, K. K., CUNNINGHAM, C. L.,  
698 MARTINEZ-GARAY, I., ZENG, H., FRANCO, S. J. & MULLER, U. 2015. Lineage  
699 tracing using Cux2-Cre and Cux2-CreERT2 mice. *Neuron*, 86, 1091-1099.
- 700 GUO, C., ECKLER, M. J., MCKENNA, W. L., MCKINSEY, G. L., RUBENSTEIN, J. L. &  
701 CHEN, B. 2013. Fezf2 expression identifies a multipotent progenitor for

702           neocortical projection neurons, astrocytes, and oligodendrocytes. *Neuron*, 80,  
703           1167-74.

704 HE, S., LI, Z., GE, S., YU, Y. C. & SHI, S. H. 2015. Inside-out radial migration facilitates  
705           Lineage-dependent neocortical microcircuit assembly. *Neuron*, 86, 1159-66.

706 HOCKFIELD, S. & MCKAY, R. D. 1985. Identification of major cell classes in the  
707           developing mammalian nervous system. *J Neurosci*, 5, 3310-28.

708 HODGE, R. D., BAKKEN, T. E., MILLER, J. A., SMITH, K. A., BARKAN, E. R.,  
709           GRAYBUCK, L. T., CLOSE, J. L., LONG, B., PENN, O., YAO, Z., EGGERMONT,  
710           J., HOLLT, T., LEVI, B. P., SHEHATA, S. I., AEVERMANN, B., BELLER, A.,  
711           BERTAGNOLLI, D., BROUNER, K., CASPER, T., COBBS, C., DALLEY, R., DEE,  
712           N., DING, S.-L., ELLENBOGEN, R. G., FONG, O., GARREN, E., GOLDY, J.,  
713           GWINN, R. P., HIRSCHSTEIN, D., KEENE, C. D., KESHK, M., KO, A. L.,  
714           LATHIA, K., MAHFOUZ, A., MALTZER, Z., MCGRAW, M., NGUYEN, T. N.,  
715           NYHUS, J., OJEMANN, J. G., OLDRE, A., PARRY, S., REYNOLDS, S., RIMORIN,  
716           C., SHAPOVALOVA, N. V., SOMASUNDARAM, S., SZAFER, A., THOMSEN, E.  
717           R., TIEU, M., SCHEUERMANN, R. H., YUSTE, R., SUNKIN, S. M.,  
718           LELIEVELDT, B., FENG, D., NG, L., BERNARD, A., HAWRYLYCZ, M.,  
719           PHILLIPS, J., TASIC, B., ZENG, H., JONES, A. R., KOCH, C. & LEIN, E. S. 2018.  
720           Conserved cell types with divergent features between human and mouse cortex.  
721           *bioRxiv*, 384826.

- 722 JIANG, X., SHEN, S., CADWELL, C. R., BERENS, P., SINZ, F., ECKER, A. S., PATEL, S.  
723 & TOLIAS, A. S. 2015. Principles of connectivity among morphologically defined  
724 cell types in adult neocortex. *Science*, 350, aac9462.
- 725 JIANG, X., SHEN, S., SINZ, F., REIMER, J., CADWELL, C. R., BERENS, P., ECKER, A.  
726 S., PATEL, S., DENFIELD, G. H., FROUDARAKIS, E. et al. 2016. Response to  
727 Comment on "Principles of connectivity among morphologically defined cell  
728 types in adult neocortex," *Science*, 353:1108, aaf6102.
- 729 KIM, E. J., JUAVINETT, A. L., KYUBWA, E. M., JACOBS, M. W. & CALLAWAY, E. M.  
730 2015. Three types of cortical layer 5 neurons that differ in brain-wide connectivity  
731 and function. *Neuron*, 88, 1253-1267.
- 732 KO, H., HOFER, S. B., PICHLER, B., BUCHANAN, K. A., SJOSTROM, P. J. & MRSIC-  
733 FLOGEL, T. D. 2011. Functional specificity of local synaptic connections in  
734 neocortical networks. *Nature*, 473, 87-91.
- 735 KOBAK, D. & BERENS, P. 2018. The art of using t-SNE for single-cell transcriptomics.  
736 *bioRxiv*, 453449.
- 737 KRIEGSTEIN, A. R. & NOCTOR, S. C. 2004. Patterns of neuronal migration in the  
738 embryonic cortex. *Trends Neurosci*, 27, 392-9.
- 739 LEE, E. S. & FORTHOFFER, R. N. 2006. *Analyzing complex survey data*, Thousand Oaks,  
740 CA, SAGE Publications.



- 741 LEFORT, S., TOMM, C., FLOYD SARRIA, J. C. & PETERSEN, C. C. 2009. The excitatory  
742 neuronal network of the C2 barrel column in mouse primary somatosensory  
743 cortex. *Neuron*, 61, 301-16.
- 744 LETINIC, K., ZONCU, R. & RAKIC, P. 2002. Origin of GABAergic neurons in the  
745 human neocortex. *Nature*, 417, 645-9.
- 746 LI, H., SHUSTER, S. A., LI, J. & LUO, L. 2018. Linking neuronal lineage and wiring  
747 specificity. *Neural Development*, 13: 5.
- 748 LI, Y., LU, H., CHENG, P. L., GE, S., XU, H., SHI, S. H. & DAN, Y. 2012. Clonally related  
749 visual cortical neurons show similar stimulus feature selectivity. *Nature*, 486, 118-  
750 21.
- 751 LLORCA, A., CICERI, G., BEATTIE, R., WONG, F. K., DIANA, G., SERAFEIMIDOU, E.,  
752 FERNANDEZ-OTERO, M., STREICHER, C., ARNOLD, S. J., MEYER, M.,  
753 HIPPENMEYER, S., MARAVALL, M. & MARIN, O. 2018. Heterogeneous  
754 progenitor cell behaviors underlie the assembly of neocortical cytoarchitecture.  
755 *bioRxiv*, 494088.
- 756 LUBKE, J., EGGER, V., SAKMANN, B. & FELDMEYER, D. 2000. Columnar  
757 organization of dendrites and axons of single and synaptically coupled excitatory  
758 spiny neurons in layer 4 of the rat barrel cortex. *J Neurosci*, 20, 5300-11.

- 759 LUBKE, J., ROTH, A., FELDMEYER, D. & SAKMANN, B. 2003. Morphometric analysis  
760 of the columnar innervation domain of neurons connecting layer 4 and layer 2/3  
761 of juvenile rat barrel cortex. *Cereb Cortex*, 13, 1051-63.
- 762 LUN, A. T., BACH, K. & MARIONI, J. C. 2016. A step-by-step workflow for low-level  
763 analysis of single-cell RNA-seq data [version 1]. *F1000Research*, 5, 2122.
- 764 MARKRAM, H., LÜBKE, J., FROTSCHER, M., ROTH, A. & SAKMANN, B. 1997.  
765 Physiology and anatomy of synaptic connections between thick tufted pyramidal  
766 neurones in the developing rat neocortex. *J Physiol*, 500, 409-40.
- 767 MAYER, C., JAGLIN, X. H., COBBS, L. V., BANDLER, R. C., STREICHER, C., CEPKO,  
768 C. L., HIPPENMEYER, S. & FISHELL, G. 2015. Clonally related forebrain  
769 interneurons disperse broadly across both functional areas and structural  
770 boundaries. *Neuron*, 87, 989-98.
- 771 MAYSHAR, Y., BEN-DAVID, U., LAVON, N., BIANCOTTI, J. C., YAKIR, B., CLARK,  
772 A. T., PLATH, K., LOWRY, W. E. & BENVENISTY, N. 2010. Identification and  
773 classification of chromosomal alterations in human induced pluripotent stem  
774 cells. *Cell Stem Cell*, 7, 521-31.
- 775 MCKENNA, A., FINDLAY, G. M., GAGNON, J. A., HORWITZ, M. S., SCHIER, A. F. &  
776 SHENDURE, J. 2016. Whole-organism lineage tracing by combinatorial and  
777 cumulative genome editing. *Science*, 353, aaf7907.

- 778 MIHALAS, A. B. & HEVNER, R. F. 2018. Clonal analysis reveals laminar fate  
779 multipotency and daughter cell apoptosis of mouse cortical intermediate  
780 progenitors. *Development*, 145, pii: dev164335.
- 781 MILLIGAN, S. R. & FINN, C. A. 1997. Minimal progesterone support required for the  
782 maintenance of pregnancy in mice. *Hum Reprod*, 12, 602-7.
- 783 MISSON, J. P., EDWARDS, M. A., YAMAMOTO, M. & CAVINESS, V. S. 1988.  
784 Identification of radial glial cells within the developing murine central nervous  
785 system: studies based upon a new immunohistochemical marker. *Brain Res Dev*  
786 *Brain Res*, 44, 95-108
- 787 MOUNTCASTLE, V. B. 1997. The columnar organization of the neocortex. *Brain*, 120 (  
788 Pt 4), 701-22.
- 789 NAGY, A., GERTSENSTEIN, M., VINTERSTEN, K. & BEHRINGER, R. 2006. Caesarean  
790 section and fostering. *CSH Protocols*, doi:10.1101/pdb.prot4381.
- 791 NOCTOR, S. C., FLINT, A. C., WEISSMAN, T. A., DAMMERMAN, R. S. &  
792 KRIEGSTEIN, A. R. 2001. Neurons derived from radial glial cells establish radial  
793 units in neocortex. *Nature*, 409, 714-20.
- 794 NOCTOR, S. C., MARTINEZ-CERDENO, V. & KRIEGSTEIN, A. R. 2007. Neural stem  
795 and progenitor cells in cortical development. *Novartis Found Symp*, 288, 59-73;  
796 discussion 73-8, 96-8.

797 NOWAKOWSKI, T. J., BHADURI, A., POLLEN, A. A., ALVARADO, B., MOSTAJO-  
798 RADJI, M. A., DI LULLO, E., HAEUSSLER, M., SANDOVAL-ESPINOSA, C.,  
799 LIU, S. J., VELMESHEV, D., OUNADJELA, J. R., SHUGA, J., WANG, X., LIM, D.  
800 A., WEST, J. A., LEYRAT, A. A., KENT, W. J. & KRIEGSTEIN, A. R. 2017.  
801 Spatiotemporal gene expression trajectories reveal developmental hierarchies of  
802 the human cortex. *Science*, 358, 1318-1323.

803 OHTSUKI, G., NISHIYAMA, M., YOSHIDA, T., MURAKAMI, T., HISTED, M., LOIS, C.  
804 & OHKI, K. 2012. Similarity of visual selectivity among clonally related neurons  
805 in visual cortex. *Neuron*, 75, 65-72.

806 OUZOUNOV, D. G., WANG, T., WANG, M., FENG, D. D., HORTON, N. G., CRUZ-  
807 HERNANDEZ, J. C., CHENG, Y. T., REIMER, J., TOLIAS, A. S., NISHIMURA, N.  
808 & XU, C. 2017. In vivo three-photon imaging of activity of GCaMP6-labeled  
809 neurons deep in intact mouse brain. *Nat Methods*, 14, 388-390.

810 PERIN, R., BERGER, T. K. & MARKRAM, H. 2011. A synaptic organizing principle for  
811 cortical neuronal groups. *Proc Natl Acad Sci U S A*, 108, 5419-24.

812 PICELLI, S., BJORKLUND, A. K., FARIDANI, O. R., SAGASSER, S., WINBERG, G. &  
813 SANDBERG, R. 2013. Smart-seq2 for sensitive full-length transcriptome profiling  
814 in single cells. *Nat Methods*, 10, 1096-8.

- 815 PICELLI, S., FARIDANI, O. R., BJORKLUND, A. K., WINBERG, G., SAGASSER, S. &  
816 SANDBERG, R. 2014a. Full-length RNA-seq from single cells using Smart-seq2.  
817 *Nat Protoc*, 9, 171-81.
- 818 PICELLI, S., BJÖRKLUND, A. K., REINIUS, B., SAGASSER, S., WINBERG, G. &  
819 SANDBERG, R. 2014b. Tn5 transposase and tagmentation procedures for  
820 massively scaled sequencing projects. *Genome Res*, 24, 2033-40.
- 821 POLLEUX, F., INCE-DUNN, G. & GHOSH, A. 2007. Transcriptional regulation of  
822 vertebrate axon guidance and synapse formation. *Nat Rev Neurosci*, 8, 331-40.
- 823 RAKIC, P. 1974. Neurons in rhesus monkey visual cortex: systematic relation between  
824 time of origin and eventual disposition. *Science*, 183, 425-7.
- 825 RAKIC, P. 1988. Specification of cerebral cortical areas. *Science*, 241, 170-6.
- 826 SMITH, G. B. & FITZPATRICK, D. 2012. Specifying cortical circuits: a role for cell  
827 lineage. *Neuron*, 75, 4-5.
- 828 TAKAHASHI, T., NOWAKOWSKI, R. S. & CAVINESS, V. S., JR. 1996. The leaving or Q  
829 fraction of the murine cerebral proliferative epithelium: a general model of  
830 neocortical neuronogenesis. *J Neurosci*, 16, 6183-96.
- 831 TAN, S. S. & BREEN, S. 1993. Radial mosaicism and tangential cell dispersion both  
832 contribute to mouse neocortical development. *Nature*, 362, 638-40.

- 833 TAN, S. S., FAULKNER-JONES, B., BREEN, S. J., WALSH, M., BERTRAM, J. F. &  
834 REESE, B. E. 1995. Cell dispersion patterns in different cortical regions studied  
835 with an X-inactivated transgenic marker. *Development*, 121, 1029-39.
- 836 TAN, S. S., KALLONIATIS, M., STURM, K., TAM, P. P., REESE, B. E. & FAULKNER-  
837 JONES, B. 1998. Separate progenitors for radial and tangential cell dispersion  
838 during development of the cerebral neocortex. *Neuron*, 21, 295-304.
- 839 TANG, F., BARBACIORU, C., WANG, Y., NORDMAN, E., LEE, C., XU, N., WANG, X.,  
840 BODEAU, J., TUCH, B. B., SIDDIQUI, A., LAO, K. & SURANI, M. A. 2009.  
841 mRNA-Seq whole-transcriptome analysis of a single cell. *Nat Methods*, 6, 377-82.
- 842 TARUSAWA, E., SANBO, M., OKAYAMA, A., MIYASHITA, T., KITSUKAWA, T.,  
843 HIRAYAMA, T., HIRABAYASHI, T., HASEGAWA, S., KANEKO, R., TOYODA,  
844 S., KOBAYASHI, T., KATO-ITOH, M., NAKAUCHI, H., HIRABAYASHI, M.,  
845 YAGI, T. & YOSHIMURA, Y. 2016. Establishment of high reciprocal connectivity  
846 between clonally related neurons is regulated by Dnmt3b DNA  
847 methyltransferase and clustered protocadherins. *BMC Biol*, 14: 103.
- 848 TASIC, B., MENON, V., NGUYEN, T. N., KIM, T. K., JARSKY, T., YAO, Z., LEVI, B.,  
849 GRAY, L. T., SORENSEN, S. A., DOLBEARE, T., BERTAGNOLLI, D., GOLDY, J.,  
850 SHAPOVALOVA, N., PARRY, S., LEE, C., SMITH, K., BERNARD, A.,  
851 MADISEN, L., SUNKIN, S. M., HAWRYLYCZ, M., KOCH, C. & ZENG, H. 2016.

852 Adult mouse cortical cell taxonomy revealed by single cell transcriptomics. *Nat*  
853 *Neurosci*, 19, 335-46.

854 TASIC, B., YAO, Z., GRAYBUCK, L. T., SMITH, K. A., NGUYEN, T. N.,  
855 BERTAGNOLLI, D., GOLDY, J., GARREN, E., ECONOMO, M. N.,  
856 VISWANATHAN, S., PENN, O., BAKKEN, T., MENON, V., MILLER, J., FONG,  
857 O., HIROKAWA, K. E., LATHIA, K., RIMORIN, C., TIEU, M., LARSEN, R.,  
858 CASPER, T., BARKAN, E., KROLL, M., PARRY, S., SHAPOVALOVA, N. V.,  
859 HIRSCHSTEIN, D., PENDERGRAFT, J., SULLIVAN, H. A., KIM, T. K., SZAFER,  
860 A., DEE, N., GROBLEWSKI, P., WICKERSHAM, I., CETIN, A., HARRIS, J. A.,  
861 LEVI, B. P., SUNKIN, S. M., MADISEN, L., DAIGLE, T. L., LOOGER, L.,  
862 BERNARD, A., PHILLIPS, J., LEIN, E., HAWRYLYCZ, M., SVOBODA, K.,  
863 JONES, A. R., KOCH, C. & ZENG, H. 2018. Shared and distinct transcriptomic  
864 cell types across neocortical areas. *Nature*, 563, 72-78.

865 TORII, M., HASHIMOTO-TORII, K., LEVITT, P. & RAKIC, P. 2009. Integration of  
866 neuronal clones in the radial cortical columns by EphA and ephrin-A signalling.  
867 *Nature*, 461, 524-8.

868 WALSH, C. & CEPKO, C. 1988. Clonally related cortical cells show several migration  
869 patterns. *Science*, 241, 1342-1345.

870 WILLSEY, A. J., SANDERS, S. J., LI, M., DONG, S., TEBBENKAMP, A. T., MUHLE, R.  
871 A., REILLY, S. K., LIN, L., FERTUZINHOS, S., MILLER, J. A., MURTHA, M. T.,

872 BICHSEL, C., NIU, W., COTNEY, J., ERCAN-SENCICEK, A. G., GOCKLEY, J.,  
873 GUPTA, A. R., HAN, W., HE, X., HOFFMAN, E. J., KLEI, L., LEI, J., LIU, W., LIU,  
874 L., LU, C., XU, X., ZHU, Y., MANE, S. M., LEIN, E. S., WEI, L., NOONAN, J. P.,  
875 ROEDER, K., DEVLIN, B., SESTAN, N. & STATE, M. W. 2013. Coexpression  
876 networks implicate human midfetal deep cortical projection neurons in the  
877 pathogenesis of autism. *Cell*, 155, 997-1007.

878 YU, Y. C., BULTJE, R. S., WANG, X. & SHI, S. H. 2009. Specific synapses develop  
879 preferentially among sister excitatory neurons in the neocortex. *Nature*, 458, 501-  
880 4.

881 YU, Y. C., HE, S., CHEN, S., FU, Y., BROWN, K. N., YAO, X. H., MA, J., GAO, K. P.,  
882 SOSINSKY, G. E., HUANG, K. & SHI, S. H. 2012. Preferential electrical coupling  
883 regulates neocortical lineage-dependent microcircuit assembly. *Nature*, 486, 113-  
884 7.

885 ZEISEL, A., MUNOZ-MANCHADO, A. B., CODELUPPI, S., LONNERBERG, P., LA  
886 MANNO, G., JUREUS, A., MARQUES, S., MUNGUBA, H., HE, L., BETSHOLTZ,  
887 C., ROLNY, C., CASTELO-BRANCO, G., HJERLING-LEFFLER, J. &  
888 LINNARSSON, S. 2015. Brain structure. Cell types in the mouse cortex and  
889 hippocampus revealed by single-cell RNA-seq. *Science*, 347, 1138-42.

## 890 **Methods**



## 891 **Animals**

892 All experiments were carried out in accordance with, and with approval from, the  
893 Institutional Animal Care and Use Committee (IACUC) at Baylor College of Medicine  
894 (BCM). The Nestin-CreER line was obtained from M. Maletic-Savatic (BCM) and  
895 maintained in A. Tolias' laboratory by crossing heterozygous males with wild type  
896 C57Bl/6J females. Each generation, potential stud males were crossed with a reporter  
897 line to confirm the lack of transgene expression in the absence of tamoxifen  
898 administration, and only those males showing minimal to no "leaky" recombination in  
899 the P1 offspring of this test cross were used as breeders for maintaining the Cre line.  
900 The Nestin-CreER line will be cryopreserved at BCM for potential future use. The  
901 reporter line ROSA26-CAG-LSL-tdTomato-WPRE (Ai9) was acquired from the Jackson  
902 Laboratory (JAX Stock #007909). The outbred CD1 line was obtained from the Center for  
903 Comparative Medicine at BCM. Six mice were used for quantification of clone size and  
904 width (3 males and 3 females), 9 mice (all males) were used for Patch-seq experiments,  
905 and 43 mice (26 males, 7 females, 10 uncertain) were used for electrophysiology  
906 experiments. For clone quantification, animals were sacrificed at postnatal day 10 (P10)  
907 and for Patch-seq and multi-patching experiments animals were sacrificed at P15-P20.  
908 All animals were on the C57Bl/6J or mixed C57Bl/6J; CD1 genetic background and were  
909 group housed with their littermates and foster mothers (both CD1 and C57Bl/6J foster  
910 mothers were used) on a 12-hour light-dark cycle.

## 911 **Lineage tracing**

912 We used a tamoxifen-inducible Cre-lox transgenic approach for lineage tracing similar  
913 to previous studies (Gao et al., 2014). Two breeding strategies were used: The majority  
914 of experimental animals were generated by crossing *Nestin-CreER* heterozygous males  
915 with *Ai9* homozygous females. A minority of experimental animals were generated by  
916 crossing double homozygous *Cre; Ai9* males (C57/Bl6J) with wild type CD1 females.  
917 The latter breeding strategy negated the need for genotyping of the pups (all would be  
918 double heterozygotes) and substantially increased litter size.

919 Tamoxifen and progesterone were dissolved together in corn oil and  
920 administered to pregnant dams at E9.5, E10.5 or E11.5 at a dose of 40–50 and 20–25  
921 mg/kg, respectively, by orogastric gavage. To help prevent tamoxifen-induced  
922 pregnancy loss (Milligan & Finn, 1997), pregnant mice also received 2 mg of  
923 progesterone dissolved in corn oil subcutaneously twice a day, starting the day after  
924 tamoxifen treatment and continuing until the pups were delivered by Caesarian section  
925 on E19.5 (as described in Nagy et al., 2006). The pups were raised by a foster mother  
926 and standard genotyping protocols were used to identify double heterozygous animals  
927 carrying both the *Cre* and reporter alleles, if needed depending on the breeding  
928 strategy.

## 929 **Transcardial perfusion and histology for clonal analysis**

930 Animals were deeply anesthetized with isoflurane and transcardially perfused with  
931 0.1M phosphate buffered saline (PBS) followed by 4% paraformaldehyde in PBS at  
932 postnatal day 10 (P10). Fixed brains were coronally sectioned at 100  $\mu\text{m}$  on a vibratome  
933 (Leica VT1000S) and stained with DAPI (0.25  $\mu\text{g}/\text{mL}$ ) for 10–15 min before mounting on  
934 charged glass slides with anti-fade mounting solution (1 mg/ml  $\rho$ -phenylenediamine in  
935 90% glycerol, 10% PBS, pH  $\sim$ 8.0). Confocal image stacks were taken on either a Zeiss  
936 LSM 510 Meta or a Zeiss LSM 780 confocal microscope.

### 937 **Acute brain slice preparation**

938 Acute brain slices were prepared as previously described (Jiang et al., 2015). In brief,  
939 animals (P15–P20) were deeply anesthetized with 3% isoflurane and decapitated. The  
940 brain was quickly removed and placed into cold (0–4  $^{\circ}\text{C}$ ) oxygenated physiological  
941 solution containing (in mM): 125 NaCl, 2.5 KCl, 1.25  $\text{NaH}_2\text{PO}_4$ , 25  $\text{NaHCO}_3$ , 1  $\text{MgCl}_2$ , 25  
942 dextrose, and 2  $\text{CaCl}_2$ , pH 7.4. Parasagittal slices 300  $\mu\text{m}$  thick were cut from the tissue  
943 blocks using a microslicer (Leica VT 1200). The slices were kept at  $37.0\pm 0.5^{\circ}\text{C}$  in  
944 oxygenated physiological solution for  $\sim$ 0.5–1 h before recordings. During recordings,  
945 the slices were submerged in a chamber and stabilized with a fine nylon net attached to  
946 a platinum ring. The recording chamber was perfused with oxygenated physiological  
947 solution. The half-time for the bath solution exchange was 1–2 min, and the temperature  
948 of the bath solution was maintained at  $34.0\pm 0.5^{\circ}\text{C}$ . All antagonists were bath applied.

### 949 **Patch-seq sample collection**

950 To obtain transcriptome data from individual neurons within radial clones, we used our  
951 recently described Patch-seq method (Cadwell et al., 2016, Cadwell et al., 2017). Briefly,  
952 the following modifications were made to the standard whole-cell patch-clamp  
953 workflow to improve RNA yield from patched cells. Glass capillaries were autoclaved  
954 prior to pulling patch pipettes, all work surfaces and micromanipulator pieces were  
955 thoroughly cleaned with DNA-OFF and RNase Zap, and all solutions that would come  
956 into contact with RNA were prepared using strict RNase-free precautions. Recording  
957 pipettes of 2–4 M $\Omega$  were filled with a small volume (approximately 0.3 $\mu$ l) of  
958 intracellular solution containing: 123 mM potassium gluconate, 12 mM KCl, 10 mM  
959 HEPES, 0.2 mM EGTA, 4 mM MgATP, 0.3 mM NaGTP, 10 mM sodium  
960 phosphocreatine, 20  $\mu$ g/ml glycogen, 13 mM biocytin, and 1 U/ $\mu$ l recombinant RNase  
961 inhibitor, pH ~7.25. RNA was collected at the end of whole-cell recordings by applying  
962 light suction while observing the cell under differential interference contrast (DIC). If  
963 any extracellular contents were observed to enter the pipette under DIC, the sample  
964 was discarded. Otherwise, the contents of the pipette were ejected into and RNase-free  
965 PCR tube containing 4  $\mu$ l of lysis buffer consisting of: 0.1% Triton X-100, 5 mM (each)  
966 dNTPs, 2.5  $\mu$ M Oligo-dT<sub>30</sub>VN, 1 U/ $\mu$ l RNase inhibitor, and 1 $\times$ 10<sup>-5</sup> dilution of ERCC RNA  
967 Spike-In Mix.

968 **cDNA synthesis, library preparation and sequencing**

969 Single cell RNA was converted to cDNA following the Smart-seq2 protocol (Picelli et  
970 al., 2014a, Cadwell et al., 2017). Samples were denatured at 72°C for 3 min and then 5.70  
971 µl of RT mix was added to each sample, for final concentrations of: 1× Superscript II  
972 first strand buffer, 1M Betaine, 10U/µl SSIIRT, 5 mM DTT, 1 U/µl RNase inhibitor, 1 µM  
973 LNA-TSO, and 6 mM MgCl<sub>2</sub>. The RT reaction was run at 42°C for 90 min followed by ten  
974 cycles of 50°C for 2 min, 42°C for 2 min, and the enzyme was inactivated by holding at 70°C  
975 for 15 min.

976 The full-length cDNA was amplified by adding 15 µl of PCR mix to each sample,  
977 consisting of 1× KAPA HiFi HotStart Ready Mix and 0.1 µM IS PCR primers, and  
978 running the following PCR program: 98°C for 3 min; 18 cycles of 98°C for 20 s 67°C for 15 s  
979 72°C for 6 min; and 72°C for 5 min. The PCR product was purified using Axygen AxyPrep  
980 mag PCR beads according to the manufacturer's instructions but using a bead:sample  
981 ratio of 0.7:1 (17.5 µl of beads: 25 µl sample).

982 To construct the final sequencing libraries, we diluted each sample to a  
983 concentration of 50 pg/µl and added 4 µl of tagmentation mix to 300 pg (6 µl) of full-  
984 length cDNA for a final concentration of: 1×tagmentation buffer (1mM TAPS-NaOH, 5  
985 mM MgCl<sub>2</sub>), 10% (wt/vol) PEG-8000, and 1.25 µM in-house produced Tn5 transposase  
986 (Picelli et al., 2014b, Cadwell et al., 2017). The tagmentation reaction was run in a  
987 thermal cycler at 55°C for 8 min and the Tn5 transposase was stripped by adding 2.5 µl of  
988 0.2% (wt/vol) SDS to each sample by incubating at room temperature for 5 min.

989 Amplification of the adapter ligated fragments was performed by adding 2.5  $\mu$ l each of  
990 index 1 (N7XX) and index 2 (N5XX) primers, diluted 1:4, from the Nextera XT index kit  
991 with a unique combination of indices for each sample, as well as 5  $\mu$ l of 5 $\times$  KAPA HiFi  
992 Buffer, 0.75  $\mu$ l of KAPA dNTP mix (10 nM each), 1.25  $\mu$ l of nuclease-free water, and 0.5  
993  $\mu$ l of KAPA enzyme (1U/ $\mu$ l) for a total volume of 25  $\mu$ l. The enrichment PCR was run  
994 according to the following program: 72 $^{\circ}$ C for 3 min, 95 $^{\circ}$ C for 30 s, 12 cycles of 95 $^{\circ}$ C for 10 s,  
995 55 $^{\circ}$ C for 30 s, and 72 $^{\circ}$ C for 30 s, and 72 $^{\circ}$ C for 5 min. After enrichment PCR, 2.5  $\mu$ l of each  
996 library was pooled into a single 1.5 mL tube and purified using the Axygen AxyPrep  
997 mag PCR beads with a bead:sample ratio of 1:1. The pooled library was diluted to 3 nM  
998 and sequenced on a single lane of an Illumina HiSeq 3000 with single-end (50 bp) reads.

### 999 **Multi-cell recordings**

1000 Simultaneous whole-cell in vitro recordings were obtained from cortical neurons as  
1001 previously described (Jiang et al., 2015). Briefly, patch recording pipettes (5–7 M $\Omega$ ) were  
1002 filled with intracellular solution containing 120 mM potassium gluconate, 10 mM  
1003 HEPES, 4 mM KCl, 4 mM MgATP, 0.3 mM Na<sub>3</sub>GTP, 10 mM sodium phosphocreatine,  
1004 Alexa-488 (10  $\mu$ M) and 0.5% biocytin (pH 7.25). Whole-cell recordings were made from  
1005 up to eight neurons simultaneously using two Quadro EPC 10 amplifiers (HEKA  
1006 Electronic, Lambrecht, Germany). A built-in LIH 8+8 interface board (HEKA) was used  
1007 to achieve simultaneous A/D and D/A conversion of current, voltage, command and  
1008 triggering signal for up to eight amplifiers. Micromanipulators (Luigs & Neumann)

1009 were mounted on a ring specifically designed for multi-patching. PatchMaster software  
1010 and custom-written Matlab-based programs were used to operate the Quadro EPC 10  
1011 amplifiers and perform online and offline analysis of the data. In order to reveal  
1012 passive membrane properties and firing patterns of each recorded neurons, neurons  
1013 were stimulated with 600 ms long current pulses starting from -100 / -200 pA with 20  
1014 pA steps.

1015         Recordings were made in cortical layers 2/3, 4 and 5, targeting fluorescently  
1016 labeled (red) cells as well as nearby unlabeled neurons that had clear pyramidal somata  
1017 and apical dendrites, with the exception of neurons in L4. We visually confirmed  
1018 successful targeting of tdTomato-expressing neurons based on the spatial overlap of  
1019 green (due to Alexa-488 in patch pipette) and red fluorescence (see Figure 4B). Unitary  
1020 excitatory postsynaptic currents (uEPSCs) were evoked by current injection into the  
1021 presynaptic neurons at 2–3 nA for 2 ms while clamping or holding the membrane  
1022 potential of the postsynaptic cells at -70mV. Each neuron was assigned to a laminar  
1023 position using layer boundaries visible in the high-contrast micrographs obtained  
1024 during electrophysiological experiments, and confirmed post-hoc using the recovered  
1025 morphology. Latency was defined as the time from the peak of the presynaptic action  
1026 potential (AP) to 5% of the maximum amplitude of the uEPSC. Amplitude was defined  
1027 as the maximum amplitude of the uEPSC from baseline. Latency and amplitude are  
1028 reported as mean±SD across all connections analyzed.

## 1029 **Morphological reconstruction after whole-cell recordings**

1030 Light microscopic examination of the morphology of each neuron was carried out  
1031 following previously described protocols (Jiang et al., 2015, Cadwell et al., 2017). In  
1032 brief, after in vitro recordings, the slices were fixed by immersion in 2.5%  
1033 glutaraldehyde/4% paraformaldehyde in 0.1 M phosphate buffer at 4°C for at least 48 h,  
1034 and then processed with an avidin-biotin-peroxidase method to reveal cell morphology.  
1035 The morphologically recovered cells were examined using a 100× oil-immersion  
1036 objective lens and camera lucida system (Neurolucida, MBF Bioscience). In addition, the  
1037 3D coordinates of the cells were measured and the distance between each pair of  
1038 simultaneously recorded neurons was computed, including Euclidean distance,  
1039 tangential distance (parallel to pial surface) and vertical distance (perpendicular to pial  
1040 surface).

## 1041 **Quantification of clone size and width**

1042 To quantify the width and number of neurons per clone, six near-complete brain sets  
1043 were analyzed using custom-written Matlab software and manual cell segmentation  
1044 (two brains each treated at E9.5, E10.5 or E11.5, continuous sections spanning 3–4 mm  
1045 along the rostrocaudal axis) as follows: a two-dimensional maximum projection of each  
1046 slice was divided into small sections and presented one at a time to a blinded observer  
1047 for manual identification of neurons throughout the cortex. Glia were excluded based  
1048 on morphology. Clones were manually reconstructed across slices by aligning fiducial



1049 anatomic landmarks such as the longitudinal fissure. The number of neurons within  
1050 each clone was calculated by adding together all of the neurons within the clone across  
1051 all contiguous slices where the clone was identifiable. On each slice, the widest part of  
1052 the clone was measured, and the overall width for each clone was computed as the  
1053 median of the measured width of the clone across all slices. Clone width and number of  
1054 neurons per clone are reported as the median and interquartile range (IQR) in the text  
1055 and all of the individual data points are shown in Figures 1D-1E. The number of clones  
1056 and animals for each treatment condition are reported in the figure legend. The  
1057 Wilcoxon rank sum test was used to compare E9.5 to E10.5 and E10.5 to E11.5 and those  
1058  $p$ -values are also shown in Figures 1D-1E.

1059 Clones were also classified as complete or incomplete after reconstruction by a  
1060 blinded observer based on whether they spanned all cortical layers, including L5 and  
1061 L6. All clones that were considered “incomplete” are shown in either Figure 1C or  
1062 Figure S1A. The fraction of all clones that were considered incomplete for each  
1063 treatment condition is reported in Figure 1F, as well as the 95% Clopper-Pearson  
1064 confidence intervals for each ratio. The number of clones and animals for each  
1065 treatment condition are reported in the figure legend. Fisher’s exact test was used to  
1066 compare E9.5 to E10.5 and E10.5 to E11.5 and those  $p$ -values are also shown in Figure  
1067 1F.

1068 **Single-cell RNA-sequencing analysis**

1069 *Quality control and data pre-processing*

1070 A total of 278 neurons from 16 radial clones were aspirated for single-cell RNA-  
1071 sequencing experiments. The quality of the full-length cDNA for each sample was  
1072 analyzed by running on an Agilent bioanalyzer with a High Sensitivity DNA chip.  
1073 Samples containing less than ~1 ng total cDNA (less than ~67pg/ $\mu$ l) or with an average  
1074 size less than 1,500 bp when integrating over the range from 300 to 9,000 bp were not  
1075 sequenced (~21%, 58/278 neurons, leaving 220 samples).

1076 The final pooled sequencing library was also analyzed on an Agilent Bioanalyzer  
1077 to confirm that the average library size was less than ~500 bp and there were minimal  
1078 primer dimers. Reads were aligned to the mouse genome (mm10 assembly) using STAR  
1079 (v2.4.2a) with default settings. Only read counts were used for the data analysis  
1080 presented here. Eleven cells were excluded after sequencing due to poor quality  
1081 sequencing results (~5%, 11/220 neurons, leaving 209 samples; poor quality was defined  
1082 as greater than three median absolute differences below the median for either total  
1083 number of reads or total number of genes detected; Figures S3A-B). Three additional  
1084 neurons (~1.4%, 3/209) were excluded from further analysis because they had fast-  
1085 spiking or regular-spiking firing patterns consistent with inhibitory interneurons,  
1086 leaving 206 samples for all subsequent analyses.

1087 Genes with less than one read per cells on average (Figure S3C) were removed  
1088 ( $n=12,841$  genes remaining) and the count data were normalized using the scran

1089 package in R Bioconductor (Lun et al., 2016). Quality control plots (Figures 2C-E, S3 and  
1090 S4) were performed using `scrn` as described in Lun et al., 2016. Across genes, there  
1091 was a strong correlation between the average count per cell and the number of cells  
1092 expressing each gene (Figure S3D) and alternatively filtering genes based on the  
1093 number of cells expressing each gene had no significant effect on our results (data not  
1094 shown). The normalized read counts were used for all subsequent analyses.

#### 1095 *Dimensionality reduction within our dataset*

1096 To reduce the dimensionality for visualizing gene expression within our own dataset,  
1097 we used the R Bioconductor implementation of t-distributed Stochastic Neighbor  
1098 Embedding (t-SNE, `runTSNE` function of the `scrn` package) with the random seed set  
1099 to 30 for reproducibility. As input, we used the normalized and  $\log_2$ -transformed counts  
1100 (“logcounts”, Table S1) of the top highly variable genes selected with a false discovery  
1101 rate set to 0.05 (computed using the `correlatePairs` function with `per.gene=TRUE`)  
1102 among the cells being plotted (n=91 genes for Figures 2F and S3C, n=43 genes for Figure  
1103 2G, and n=41 genes for Figure 2H). The parameter for perplexity was set to 30 when  
1104 analyzing all cells (Figures 2F and S3C), to 10 when analyzing only L2/3 cells (Figure  
1105 2G), and to 15 when analyzing only L5 cells (Figure 2H). Very similar two-dimensional  
1106 projections were generated when different parameters or number of genes were used.

#### 1107 *Generalized linear models (GLMs) to predict layer and region*

1108 We used the `cv.glmnet` function in R Bioconductor to train a GLM to predict either  
1109 layer (Figure 2F, right panel) or cortical region (Figures 2G and 2H, right panels) as  
1110 follows:

```
1111 cvfit<-  
1112 cv.glmnet(logcounts,factor,family="multinomial",parallel=TRUE,type.meas  
1113 ure="class",nfolds=20)
```

1114 The model performance was estimated from the lowest prediction error across all  
1115 lambda values as follows:

```
1116 perc_correct <- 1-cvfit$cvm[which(cvfit$lambda==cvfit$lambda.min)]
```

1117 To generate a null distribution for each model, we randomly shuffled either the layer  
1118 position (for Figure 2F) or cortical region (for Figures 2G and 2H) by resampling  
1119 without replacement 1000 times. For each iteration, the model performance was  
1120 evaluated as described above. The  $p$ -values are computed as the fraction of resamples  
1121 with model performance (percent correct) greater than or equal to the unshuffled model  
1122 performance. The values in the rightmost panels of Figures 2F-H are the unshuffled  
1123 model performance (in black) and the mean and 95% coverage interval of the resampled  
1124 model performances (in grey).

1125 *Mapping to the reference dataset using t-SNE*

1126 Using the count matrix of Tasic et al. 2018 ( $n=23,822$ ,  $d=45,768$ ), we selected 3000 “most  
1127 variable” genes as described in Kobak & Berens, 2018. Briefly, we found genes that had,  
1128 at the same time, high non-zero expression and high probability of near-zero

1129 expression. In particular, we excluded all genes that had counts of at least 32 in fewer  
1130 than 10 cells. For each remaining gene, we computed the mean  $\log_2$  count across all  
1131 counts that were larger than 32 (non-zero expression,  $\mu$ ) and the fraction of counts that  
1132 were smaller than 32 (probability of near-zero expression,  $\tau$ ). Across genes, there was a  
1133 clear inverse relationship between  $\mu$  and  $\tau$ , that roughly followed an exponential law  $\tau$   
1134  $\approx \exp(-\mu+a)$  for some horizontal offset  $a$ . Using a binary search, we found a value  $b$  of  
1135 this offset that yielded 3000 genes with  $\tau > \exp(-\mu+b) + 0.02$ . These 3000 genes were  
1136 selected as input for dimensionality reduction.

1137 The t-SNE visualization of the Tasic et al. 2018 dataset shown in Figures 3A, S3A,  
1138 and S4 was generated as described in our previous work (Kobak & Berens, 2018). It was  
1139 computed there using PCA initialization and perplexity combination of 50 and 500,  
1140 following preprocessing steps of library size normalization (by converting counts to  
1141 counts per million), feature selection (using the 3000 most variable genes),  $\log_2(x+1)$   
1142 transformation, and reducing the dimensionality to 50 using PCA. The resulting t-SNE  
1143 coordinates for all Tasic et al. cells are given in Table S2.

1144 Out of 3000 most variables genes selected in the Tasic et al. data set, 1181 genes  
1145 were present among the 12,841 that we selected in our data set. We used this set of 1181  
1146 genes for the mapping of our cells to the reference data. For each of the  $n=206$  Patch-seq  
1147 cells in our dataset, we computed its Pearson correlation with each of the 23,822  
1148 reference cells across the 1181 genes, after all counts were  $\log_2(x+1)$  transformed. We

1149 identified the 25 reference cells with the maximal correlation (25 “nearest neighbors” of  
1150 our cell) and positioned our cell at the median t-SNE location of those 25 reference cells  
1151 (Kobak & Berens, 2018).

1152 We performed bootstrapping over genes to estimate the uncertainty of this  
1153 mapping (Kobak & Berens, 2018). Specifically, we selected a bootstrap sample of 1181  
1154 genes and repeated the mapping as described above. This was repeated 100 times, to  
1155 obtain 100 bootstrap positions of each cell. We computed the Euclidean distance  
1156 between the original mapping position and each of the bootstrap positions, and took the  
1157 80th percentile of the resulting distribution as a measure of mapping precision. If all  
1158 bootstrap positions are close each to each other, the 80th percentile distance will be  
1159 small (high precision). If they are far from each other, it will be large (low precision).  
1160 This measure was used in Figures 3A and S3A (cells with the 80th percentile above 10  
1161 were plotted as small dots, cells with the 80th percentile greater than 5 but less than or  
1162 equal to 10 were plotted as intermediate size dots, and cells with the 80th percentile less  
1163 than or equal to 5 were plotted as large dots) and also to compare the quality of the  
1164 mapping between V1 and S1 cells (see Results).

#### 1165 *Mapping to the reference clusters*

1166 To assign each of our Patch-seq cells to one of the reference clusters, we log-  
1167 transformed all counts from Tasic et al., 2018 with  $\log_2(x+1)$  transformation and  
1168 averaged the log-transformed counts across all cells in each of the 133 clusters to obtain

1169 reference transcriptomic profiles of each cluster, using the same 1181 genes as above  
1170 (133×1181 matrix). We applied the same  $\log_2(x+1)$  transformation to the read counts of  
1171 our Patch-seq cells, and for each cell computed Pearson correlation across the 1181  
1172 genes with all 133 Tasic et al. 2018 clusters. Each cell was assigned to the cluster to  
1173 which it had the highest correlation (nearest centroid classifier).

#### 1174 *Probability of related and unrelated neurons mapping to the same clusters*

1175 To compute the probability related and unrelated pairs of neurons mapping to the same  
1176 clusters (Figures 3C, 3D, S3C, and S3D), we computed the number of pairs mapping to  
1177 the same cluster as a fraction of all of the pairs analyzed. For Figures 3C and 3D, we first  
1178 grouped the 133 transcriptomic clusters into ten broad classes, as labeled in Figure 3A.  
1179 In the supplementary Figures S3C and S3D we kept all 133 original clusters. In Figures  
1180 3C and S3C, we included all pairs of neurons, and in Figures 3D and S3D we included  
1181 only pairs of neurons that were positioned within the same cortical layer. The values  
1182 shown are the overall fraction of pairs mapping to the same cluster or broad class, and  
1183 the 95% Clopper-Pearson confidence intervals. The  $p$ -values are computed using the  
1184 Chi-squared test.

#### 1185 **Comparison of connection probability between related and unrelated neurons**

##### 1186 *Comparison using raw data*

1187 Related pairs were defined as pairs in which both the pre- and post-synaptic neuron  
1188 were tdTomato-positive excitatory neurons organized in a well-isolated radial unit of

1189 labeled cells (>300 $\mu$ m separation from other labeled clones). Control pairs were defined  
1190 as pairs of nearby excitatory neurons in which one cell was tdTomato-positive (either  
1191 the pre- or post-synaptic cell, but not both) and one was tdTomato-negative. The  
1192 connection probability was determined as the total number of connections divided by  
1193 the total number of connections tested within each category (all connections tested, only  
1194 vertical connections, only lateral connections, and each layer-defined connection type).  
1195 The values shown in Figures 4D-F and 5C-D are the connection probability and 95%  
1196 Clopper-Pearson confidence intervals. The number of connections tested for each  
1197 category is reported in the figure legends. Fisher's exact test was used to compare the  
1198 connection probabilities between related and unrelated cells and those  $p$ -values are  
1199 shown in Figures 4D-F and 5C-D.

#### 1200 *Comparison to distance-matched controls*

1201 Related pairs were defined as above. In contrast to the above comparison, control pairs  
1202 were defined as pairs of excitatory neurons in which one or both cells were tdTomato-  
1203 negative, to increase the number of available controls for distance-matching (a caveat is  
1204 that two tdTomato-negative cells can in principle belong to another clone, but we  
1205 consider this to be unlikely). For each related pair, we defined a set of "matched"  
1206 control pairs for which the pre- and post-synaptic neurons were located in the same  
1207 cortical layers as the pre- and post-synaptic neurons of the related pair, and for which  
1208 both the tangential and vertical distances between the control cells were within 20  $\mu$ m



1209 of the analogous distances between the two related cells. Related pairs that did not have  
1210 any matching control pairs fitting these criteria were excluded from further analysis.

1211 To compare connectivity between related and distance-matched control pairs, we  
1212 used bootstrapping over related pairs. Specifically, on each of the 1000 iterations, we  
1213 drew a bootstrap sample (resample with replacement) from the set of related pairs, and  
1214 selected one matched control pair for each related pair. Values in Figure S6 are the  
1215 mean and 95% coverage intervals across resamples of related and matched control  
1216 connection probabilities. For each resample, we also computed the difference between  
1217 the related and matched control connection probabilities. We “inverted” the bootstrap  
1218 confidence interval for this difference to estimate the  $p$ -value. Specifically, the mean  
1219 difference in connection probability was first subtracted from all bootstrapped  
1220 differences, and the  $p$ -value was estimated as the fraction of resampled differences with  
1221 absolute value greater than or equal to the original mean difference (two-tailed test).  
1222 The  $p$ -values are shown in Figure S6.

### 1223 *Comparison at different rostrocaudal positions*

1224 To determine whether the effect of cell lineage varied according to rostrocaudal  
1225 position, clones were sorted into two groups based on their rostrocaudal position  
1226 (“rostral” includes clones within S1 proper but also other rostral cortical areas, and  
1227 similarly for “caudal” clones and V1). The values shown in Figure S7 are the connection  
1228 probability and 95% Clopper-Pearson confidence intervals for each group. The number

1229 of connections tested in each category is reported in the figure legend. Fisher's exact test  
1230 was used to compare the connection probabilities between related and unrelated cells in  
1231 each group and those  $p$ -values are shown in Figure S7.

1232 *Generalized linear model of connection probability*

1233 We also built a generalized linear model (GLM) to explain connection probability ( $P$ ) as  
1234 a function of connection class, lineage relationship, Euclidean distance between the  
1235 cells, and rostrocaudal position (a numeric value ranging from 1 to 5 with 1 being most  
1236 rostral and 5 being most caudal). We fit a binomial GLM (using `glmfit` function in  
1237 Matlab) containing the relevant linear terms and all possible pairwise interactions:

$$1238 \quad g(P) = \beta_0 + \beta_L \cdot L + \beta_C \cdot C + \beta_D \cdot D + \beta_R \cdot R + \beta_{LC} \cdot L \cdot C + \beta_{LD} \cdot L \cdot D \\ 1239 \quad + \beta_{LR} \cdot L \cdot R + \beta_{CD} \cdot C \cdot D + \beta_{CR} \cdot C \cdot R + \beta_{DR} \cdot D \cdot R$$

1240 where  $\beta_0$  is a constant term,  $L$  is a binary variable representing the lineage relationship  
1241 (1 for related and 0 for unrelated),  $C$  is a binary variable representing the connection  
1242 type (1 for vertical and 0 for lateral),  $D$  is the Euclidean distance between the cells in  
1243 microns,  $R$  is a numeric variable representing the rostrocaudal position of the clone  
1244 with integer values from 1 (most rostral) to 5 (most caudal), and  $\beta_i$  are the  
1245 corresponding coefficients. The presence of a connection was modeled as Bernoulli  
1246 distributed with probability  $P$ , using the logit link function,  $g(P) = \ln(P/(1-P))$ . The  
1247 estimated coefficients and  $p$ -values of each term are reported in Table S3.

1248 **Simple connectivity model to estimate expected input from related cells**

1249 For a particular postsynaptic cell in layer  $j \in \{L2/3, L4, L5\}$ , we modeled the number of  
1250 input connections from cells in a particular layer  $i$  and a particular lineage relation  
1251  $l \in \{\text{related, unrelated}\}$  as a binomial distribution  $B(n_{il}, p_{il})$ . The probabilities  $p_{ijl}$  were  
1252 set to the measured connection probabilities. The pool sizes  $n_{il}$  were set to the product  
1253  $n_{il} = n_i q_l$  of the number of cells  $n_i$  residing in the particular input layer and the fraction  
1254  $q_l$  of cells with that particular lineage. To compute  $n_i$ , we assumed that a cortical slab of  
1255  $1\text{mm}^2$  contains about 100,000 neurons and that 80% of those are excitatory neurons. We  
1256 further assumed that a particular cell only connects to other cells within a tangential  
1257 radius of  $r$ , which we set to half the 99% quantile of pairwise distances measured in our  
1258 dataset ( $r = 0.087$  mm). The resulting cylinder of cortex contained  $\pi r^2 \times 80,000 \approx$   
1259 1,908 excitatory neurons. We assumed that 35% of these cells reside in L2/3, 15% in L4,  
1260 25% in L5, and 25% in L6. The fraction  $q_c$  of related cells in that cylinder was computed  
1261 as the ratio  $q_r = \frac{k}{N}$  of the median clone size ( $k = 86$ ) and the number of cells in the  
1262 cortical cylinder ( $N = 1908$ ). All model computations were performed using Python.

1263 We computed the expected fraction of related cells in the input connections to a  
1264 particular cell (Figures 4G and 5E) as

1265 
$$e_{ij} = \frac{p_{ijr} n_{ir}}{p_{ijr} n_{ir} + p_{iju} n_{iu}} = \frac{p_{ijr} q_r}{p_{ijr} q_r + p_{iju} (1 - q_r)},$$

1266 where subscript  $r$  refers to related neurons and  $u$  to unrelated neurons. Note that  $q_u =$   
1267  $1 - q_r$ . We propagated the standard error from  $p_{ijl}$  to  $e_{ij}$  using a first order Taylor

1268 approximation: In general, the propagated variance of a function  $f(X, Y)$  of two random  
1269 variables is given by

$$1270 \quad \text{Var}[F] \approx F_x^2 \sigma_x^2 + F_y^2 \sigma_y^2 + 2F_x F_y \sigma_{xy}$$

1271 where  $F_x$  and  $F_y$  denote the partial derivatives of  $F$  with respect to the variables in the  
1272 subscript, and  $\sigma_x^2$ ,  $\sigma_y^2$ , and  $\sigma_{xy}$  denote the variances and covariance of  $X$  and  $Y$  (Lee et al.,  
1273 2006). In our case, the random variables are the estimators  $\hat{p}_{ijl}$  of the connection  
1274 probabilities which have a variance (squared standard error) of  $\sigma_{ijl}^2 = \frac{\hat{p}_{ijl}(1-\hat{p}_{ijl})}{m_{ijl}}$  and no  
1275 covariance because we assume that the two different lineages were measured  
1276 independently. The denominator  $m_{ijl}$  denotes the number of tested connections for that  
1277 particular lineage and combination of layers. This yields the following standard error  
1278 for  $e_{ij}$

$$1279 \quad \text{SE}[e_{ij}] = \frac{q_c^2(1-q_c)^2 \left( \hat{p}_{iju}^2 \frac{\hat{p}_{ijc}(1-\hat{p}_{ijc})}{n_{ic}} + \hat{p}_{ijc}^2 \frac{\hat{p}_{iju}(1-\hat{p}_{iju})}{n_{iu}} \right)}{(\hat{p}_{iju}(1-q_c) + \hat{p}_{ijc}q_c)^4}$$

1280 The values reported in Figures 4G and 5E are the estimates and propagated standard  
1281 errors.

## 1282 **Log-ratios of connection probabilities between related and unrelated neurons**

1283 To visualize the overall pattern of connectivity differences between related and  
1284 unrelated neurons, we used a heatmap of the log ratio of connection probabilities for  
1285 related and unrelated neurons (Figure 5F). For each layer-defined connection type, we  
1286 took the  $\log_2$  of the ratio of the related pair connection probability and unrelated pair

1287 connection probability, with Laplace smoothing (by adding 1 to both the numerator and  
1288 denominator) applied to both probabilities. Specifically, if  $A$  out of  $B$  related pairs and  $C$   
1289 out of  $D$  unrelated pairs were connected, we computed the log-ratio as  
1290  $\log_2\{[(A+1)/(B+1)] / [(C+1)/(D+1)]\}$ . The 95% confidence intervals were computed via  
1291 bootstrapping. For each bootstrap iteration, we generated  $A_{\text{boot}}$  as a binomial draw with  
1292  $p=(A+1)/(B+1)$  and  $n=B$ , and  $C_{\text{boot}}$  as a binomial draw with  $p=(C+1)/(D+1)$  and  $n=D$ . As the  
1293 95% confidence interval, we took 95% coverage interval of the bootstrapped log-ratios  
1294  $\log_2\{[(A_{\text{boot}}+1)/(B+1)] / [(C_{\text{boot}}+1)/(D+1)]\}$ .

## 1295 Supplemental Information

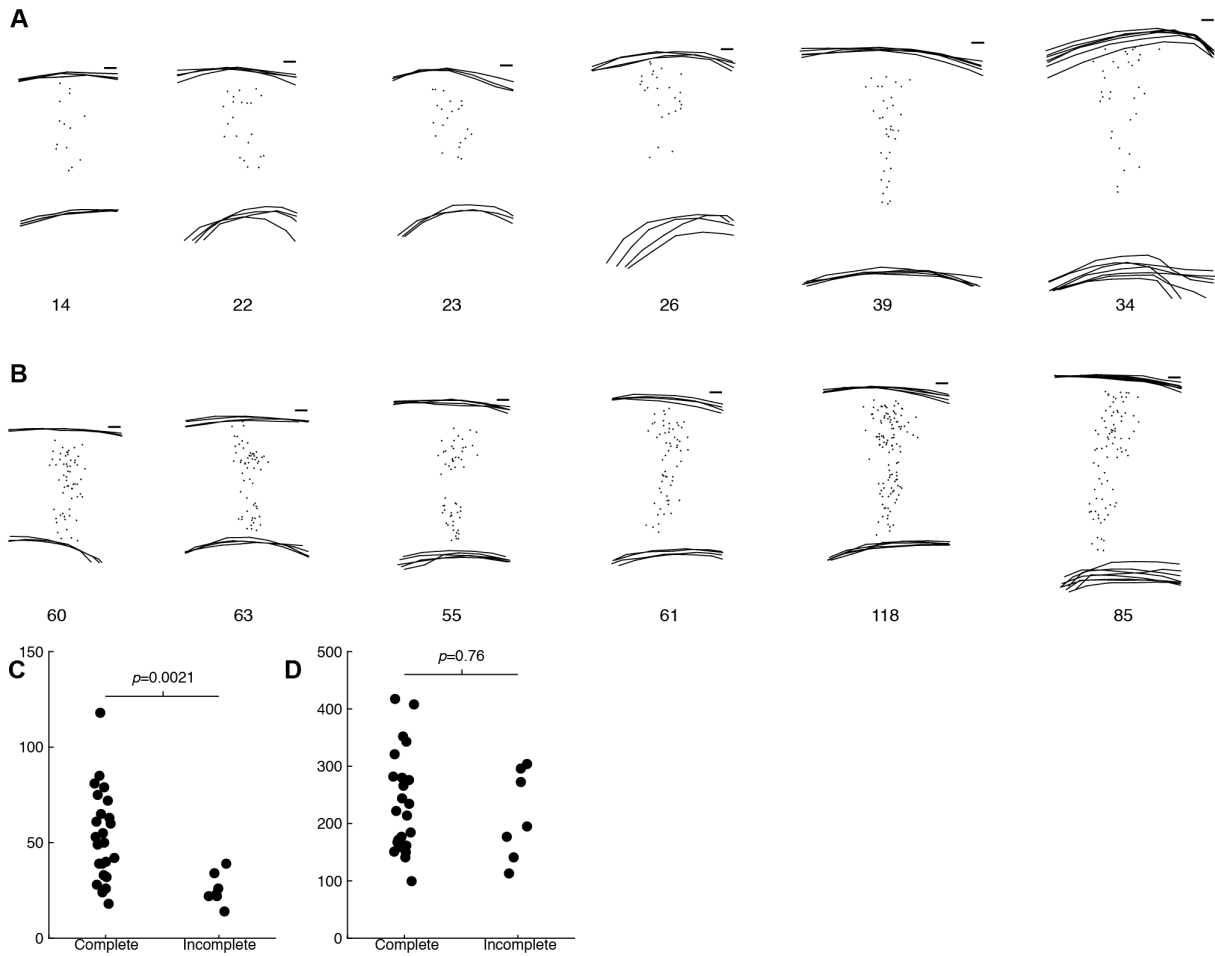

1296

1297 **Figure S1. Clones induced at E11.5 are often restricted to superficial layers, related to Figure 1. (A)**

1298 Clones induced at E11.5 that were considered “incomplete” due to lack of neurons in deep cortical layers.

1299 **(B)** Examples of clones induced at E11.5 that were considered “complete” due to inclusion of neurons in

1300 deep cortical layers. **(C and D)** Incomplete clones contain fewer neurons **(C)** but there is no difference in

1301 clone width between complete and incomplete clones **(D)**;  $n = 24$  and  $7$  for complete and incomplete

1302 clones;  $p$ -values computed using Wilcoxon rank sum test. Scale bars:  $100 \mu\text{m}$  **(A and B)**. Related to Figure

1303 1.

1304

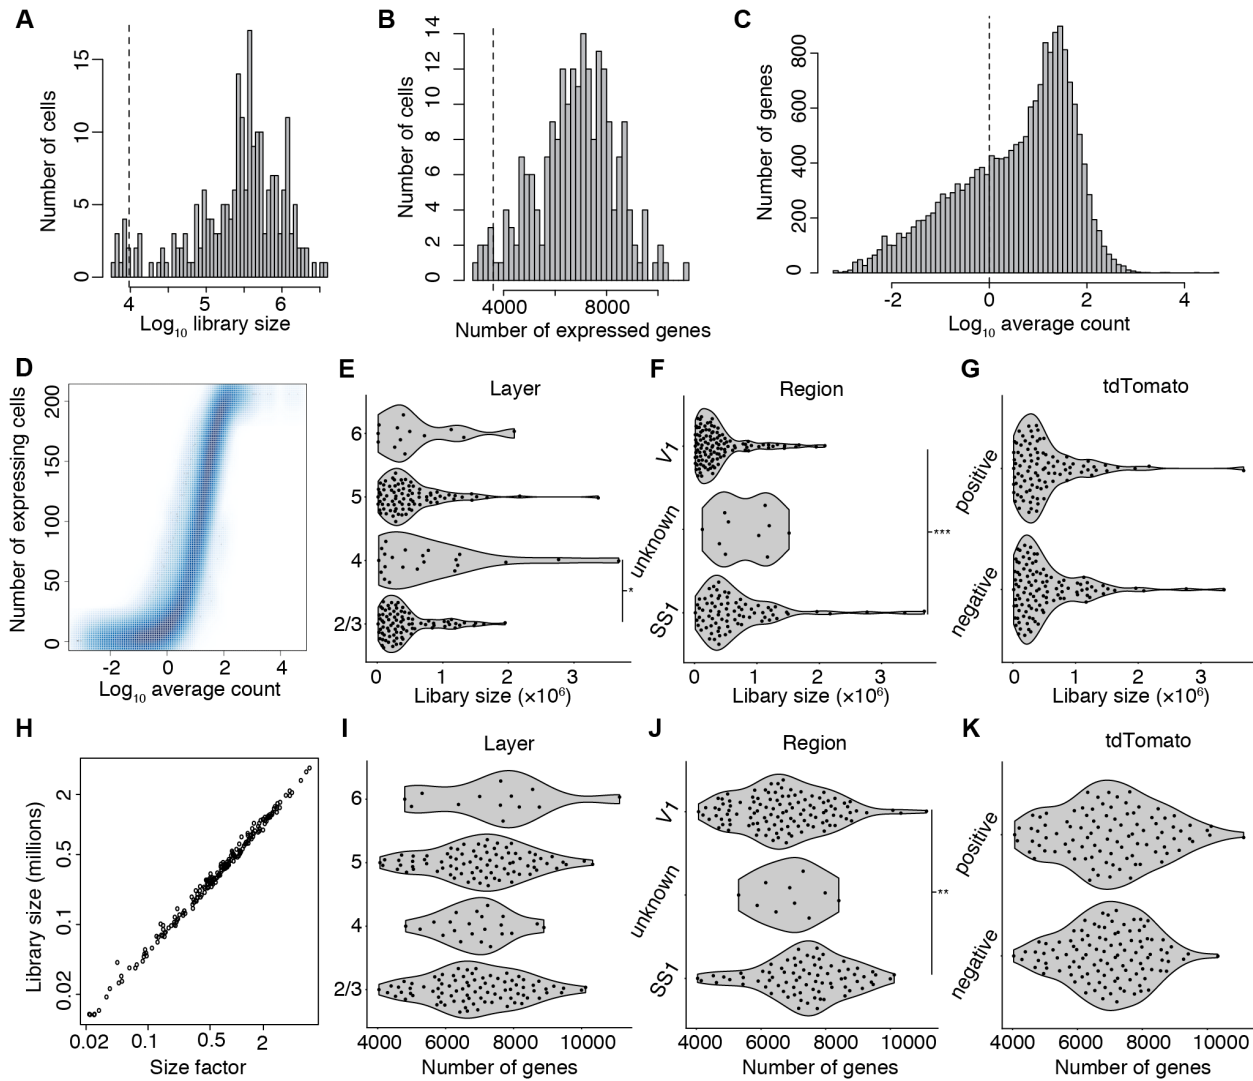

1305

1306 **Figure S2. Quality control criteria for single-cell RNA-sequencing data, related to Figure 2. (A and B)**

1307 Histograms of library size (A) and number of genes expressed (B) for all sequenced cells. Cells falling

1308 more than three median absolute differences below the median (dotted lines) were excluded (n=11 based

1309 on library size and n=8 based on number of genes expressed; all 8 cells excluded based on number of

1310 genes are also excluded based on library size, leaving 206 out of 217 sequenced cells passing these

1311 combined criteria). (C) Histogram of average number of counts per cell across genes. Genes with less than

1312 1 count per cell on average (dotted line) were excluded from further analyses (n=12,841 genes passing this

1313 criteria). (D) Correlation between average number of counts per cell and total number of cells expressing

1314 each gene, across genes. **(E–G)** Library sizes of cells in different layers (**E**; n=87, 22, 84, and 13 cells in  
1315 layers 2/3, 4, 5, and 6 respectively; One-way analysis of variance with post-hoc pairwise comparisons  
1316 using Tukey’s honestly significant difference procedure), cortical regions (**F**; n = 79, 10, and 117 cells in  
1317 primary somatosensory (SS1), unknown, and primary visual (V1) areas respectively; One-way analysis of  
1318 variance with post-hoc pairwise comparisons using Tukey’s honestly significant difference procedure),  
1319 and with (positive) or without (negative) tdTomato-expression (**G**; n = 110 and 96 negative and positive  
1320 cells respectively; One-way analysis of variance). **(H)** Correlation between size factors used for  
1321 normalization and library size, across cells. **(I–K)** Number of genes expressed by cells in different layers  
1322 (**I**; n=87, 22, 84, and 13 cells in layers 2/3, 4, 5, and 6 respectively; One-way analysis of variance), cortical  
1323 regions (**J**; n = 79, 10, and 117 cells in primary somatosensory (SS1), unknown, and primary visual (V1)  
1324 areas respectively; One-way analysis of variance with post-hoc pairwise comparisons using Tukey’s  
1325 honestly significant difference procedure), and with (positive) or without (negative) tdTomato-expression  
1326 (**K**; n = 110 and 96 negative and positive cells respectively; One-way analysis of variance). Values are raw  
1327 data points expressed as scatter plots (**D** and **H**, **D** with smoothing), binned (**A–C**), or with overlay violin  
1328 plots (**E–G** and **I–K**). Only significant ( $p < 0.05$ ) p-values are shown (\* $p < 0.05$ ; \*\* $p < 0.01$ ; \*\*\* $p < 0.001$ ). Related  
1329 to Figure 2.  
1330



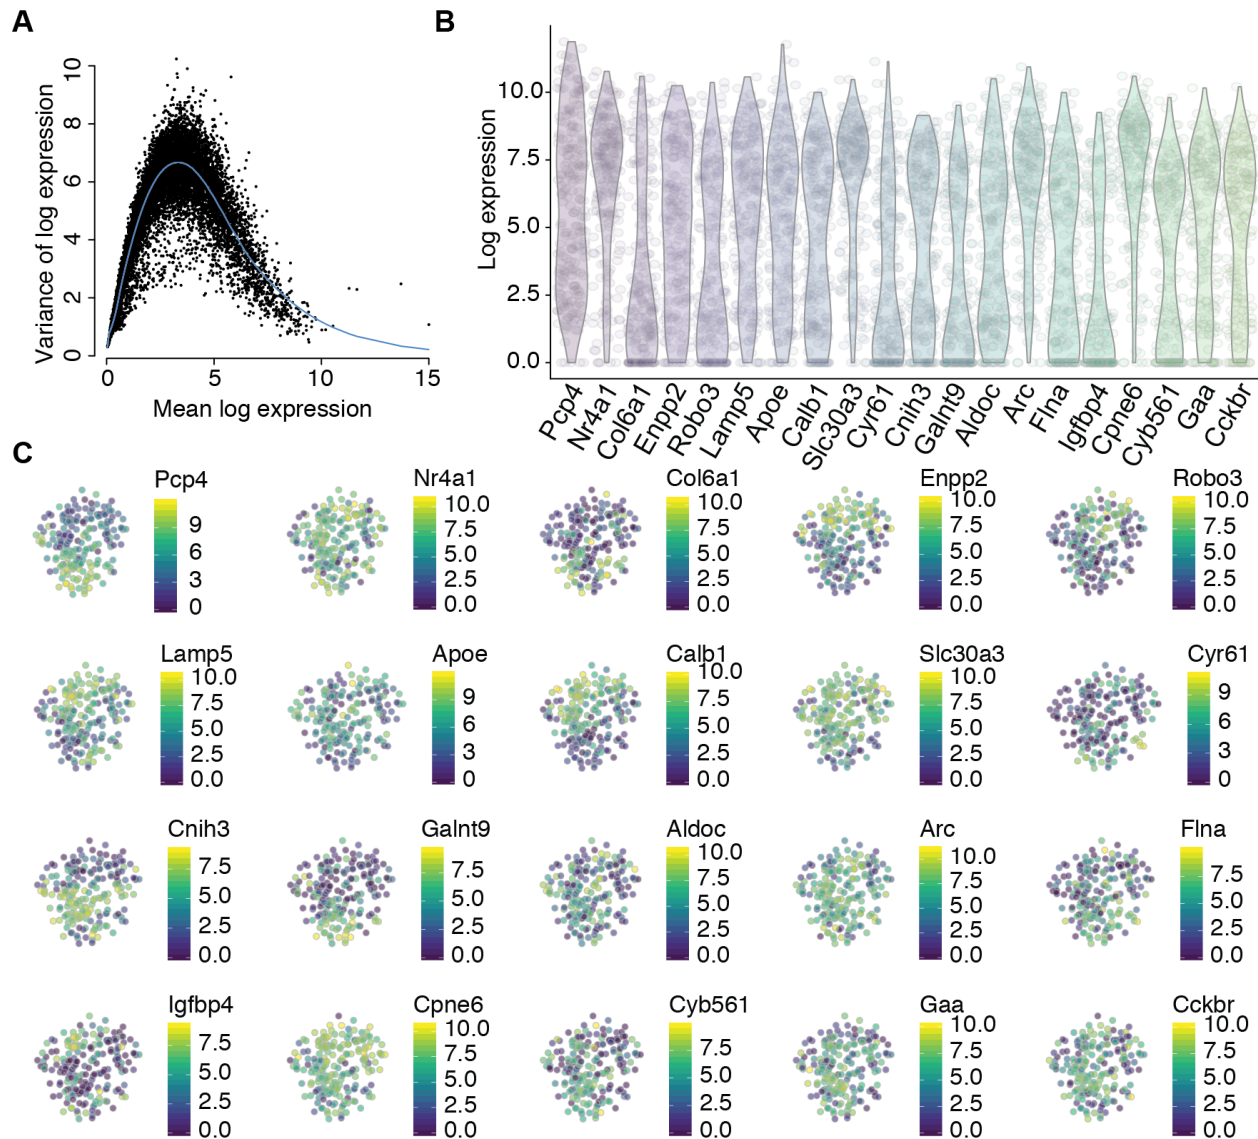

1331

1332 **Figure S3. Expression of top highly variable genes, related to Figure 2. (A)** Variance of normalized log-

1333 transformed expression for each gene plotted against the mean log-transformed expression. **(B)** Violin

1334 plots of log-transformed expression values for the top twenty highly variable genes across all cells. **(C)** T-

1335 distributed stochastic neighbor embedding (t-SNE) was performed using the top highly variable and

1336 correlated genes (n=91). Plots are colored by log-transformed expression values for the top twenty highly

1337 variable genes. Related to Figure 2.

1338

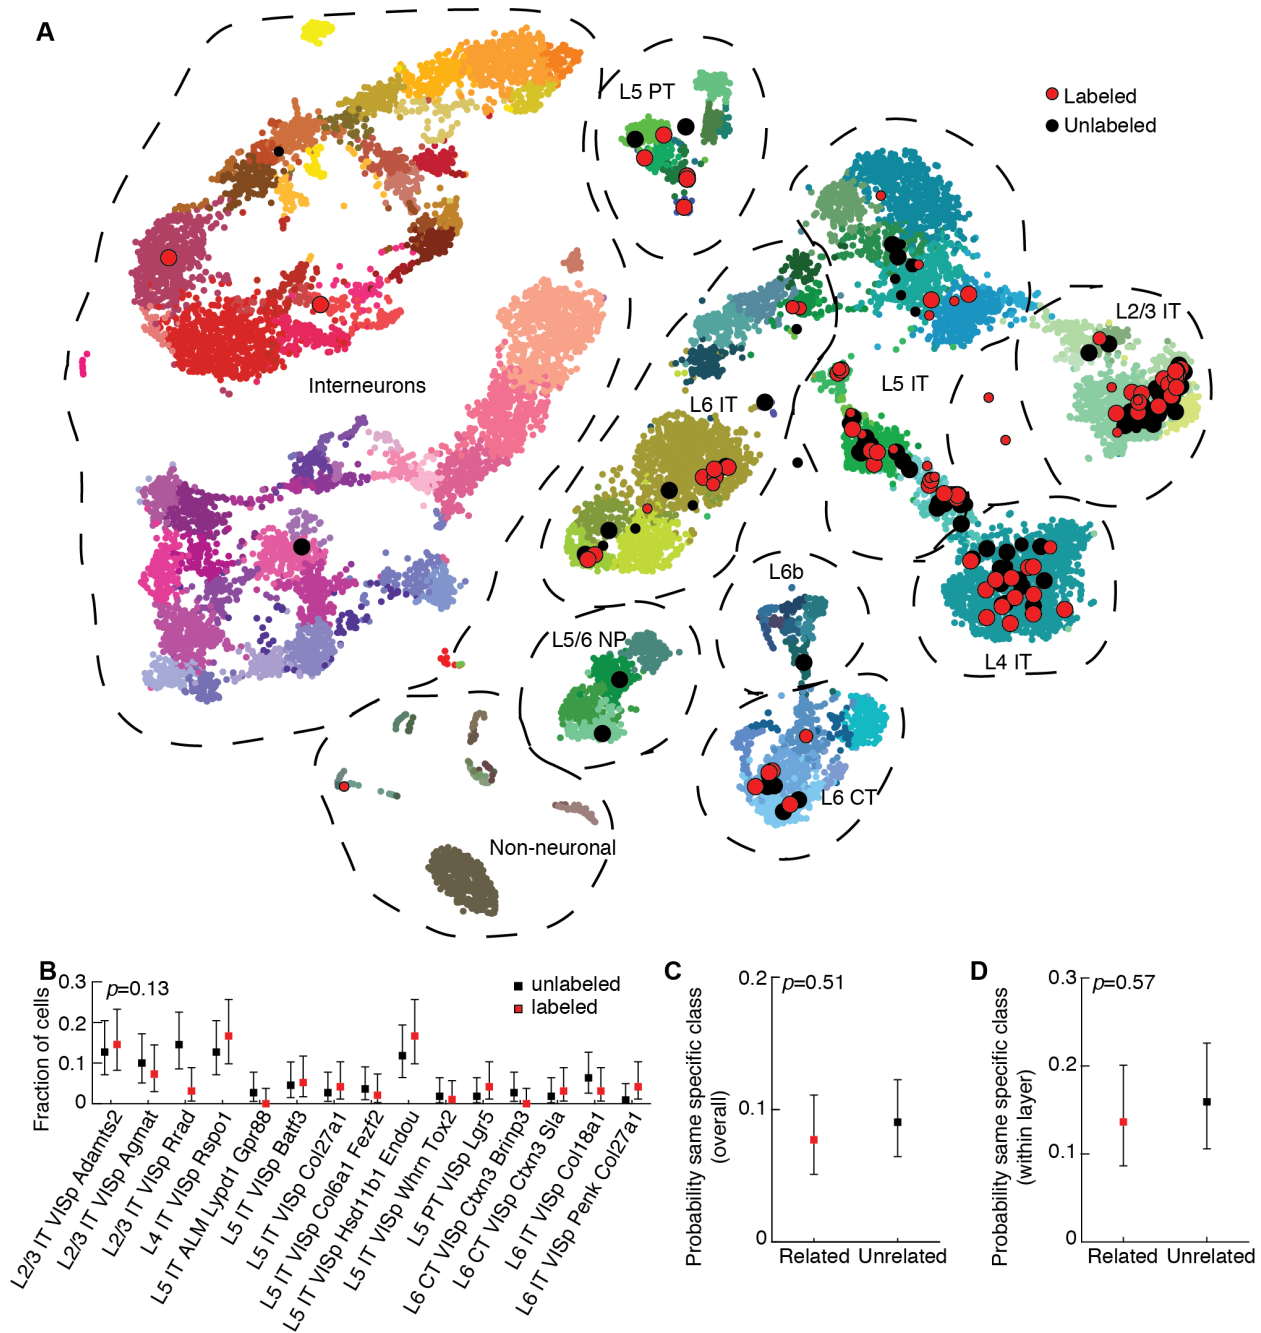

1339

1340 **Figure S4. Radial clones are composed of diverse subtypes of excitatory neurons with no evidence of**

1341 **fate restriction, related to Figure 3. (A) T-distributed stochastic neighbor embedding (t-SNE) plot similar**

1342 **to 3A, but with Patch-seq data points (black outline, n=96 and 110 labeled and unlabeled cells**

1343 **respectively) colored according to tdTomato expression status rather than cortical layer, aligned with a**

1344 **recently published mouse cell type atlas (data points with no outline; n=23,822; from (Tasic et al., 2018);**

1345 colors denote transcriptomic types and are taken from the original publication). The t-SNE of the  
1346 reference dataset and the positioning of Patch-seq cells were performed as described in (Kobak &  
1347 Behrens, 2018), see Methods. The size of the Patch-seq data points denotes the precision of the mapping  
1348 (see Methods): small points indicate high uncertainty. **(B–D)** A similar analysis to **3B–D**, but using  
1349 specific cell types (tree leaves of the cell type atlas) rather than broad classes. **(B)** Fraction of labeled  
1350 (n=96) and unlabeled (n=110) cells that mapped to each of the specific clusters identified in (Tasic et al.,  
1351 2018) with greater than three Patch-seq cells total (no significant difference, Chi-squared test). **(C and D)**  
1352 Probability of related and unrelated cell pairs mapping to the same specific cluster either overall **(C;**  
1353 n=337 related pairs, n=409 unrelated pairs; no significant difference, Chi-squared test) or when  
1354 conditioned on layer position **(D;** n=154 related pairs, n=157 unrelated pairs; no significant difference,  
1355 Chi-squared test). Related to Figure 3.

1356

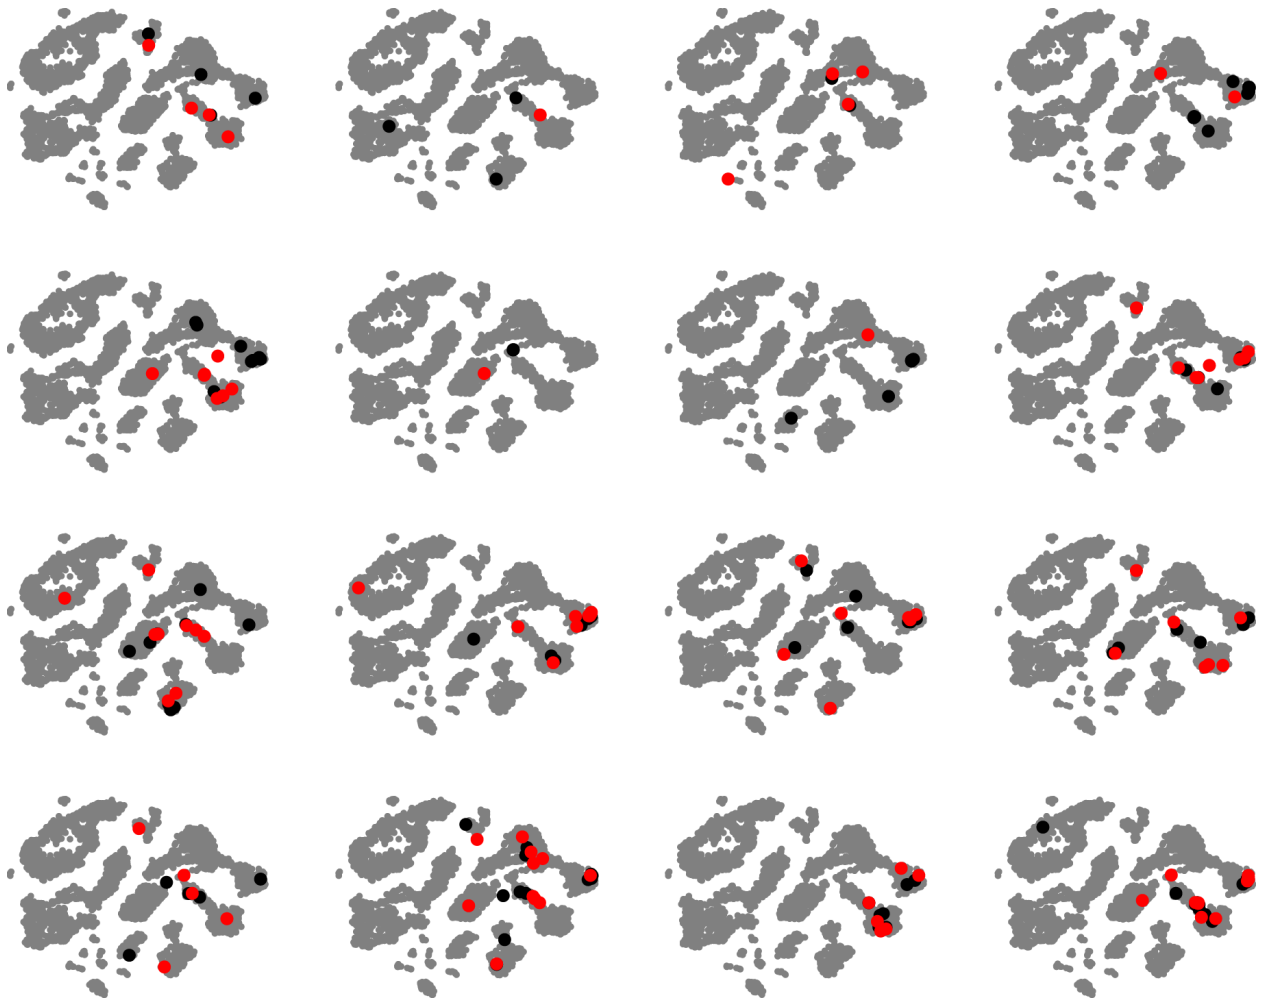

1357

1358 **Figure S5. Transcriptomic diversity of individual radial clones, related to Figure 3.** t-SNE plots for each

1359 Patch-seq experiment (n=16) showing clonally related cells in red and unrelated cells in black, projected

1360 onto the reference atlas (grey, from (Tasic et al., 2018)). Related to Figure 3.

1361

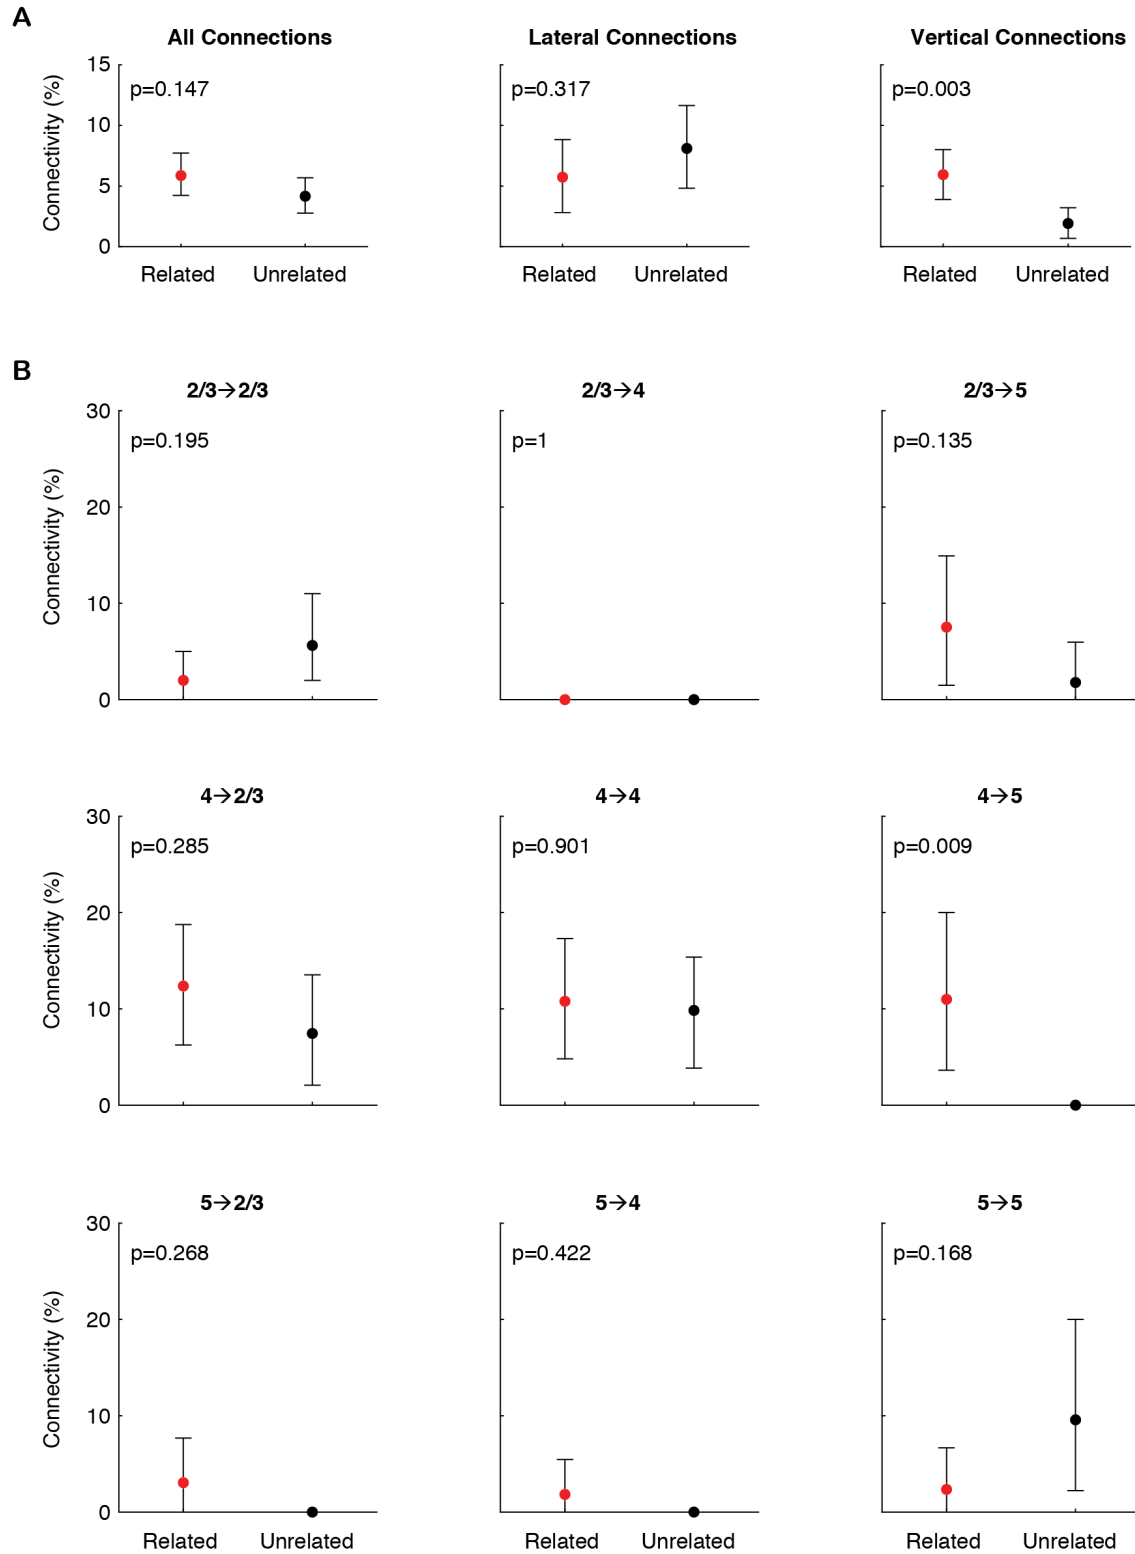

1362

1363 **Figure S6. Connectivity differences between clonally related and distance-matched unrelated pairs of**

1364 **neurons, related to Figures 4 and 5. (A) Connectivity for all connections (left panel); only lateral, within-**

1365 layer connections (middle panel); or only vertical, across-layer connections (right panel). **(B)** Connectivity  
1366 for each layer-defined connection type tested. Pre- and post-synaptic location of the cell bodies is  
1367 designated above each plot. In **(A and B)**, error bars are 95% coverage intervals computed by resampling  
1368 (see Methods);  $p$ -values are two-sided and computed by resampling (see Methods). Related to Figures 4  
1369 and 5.

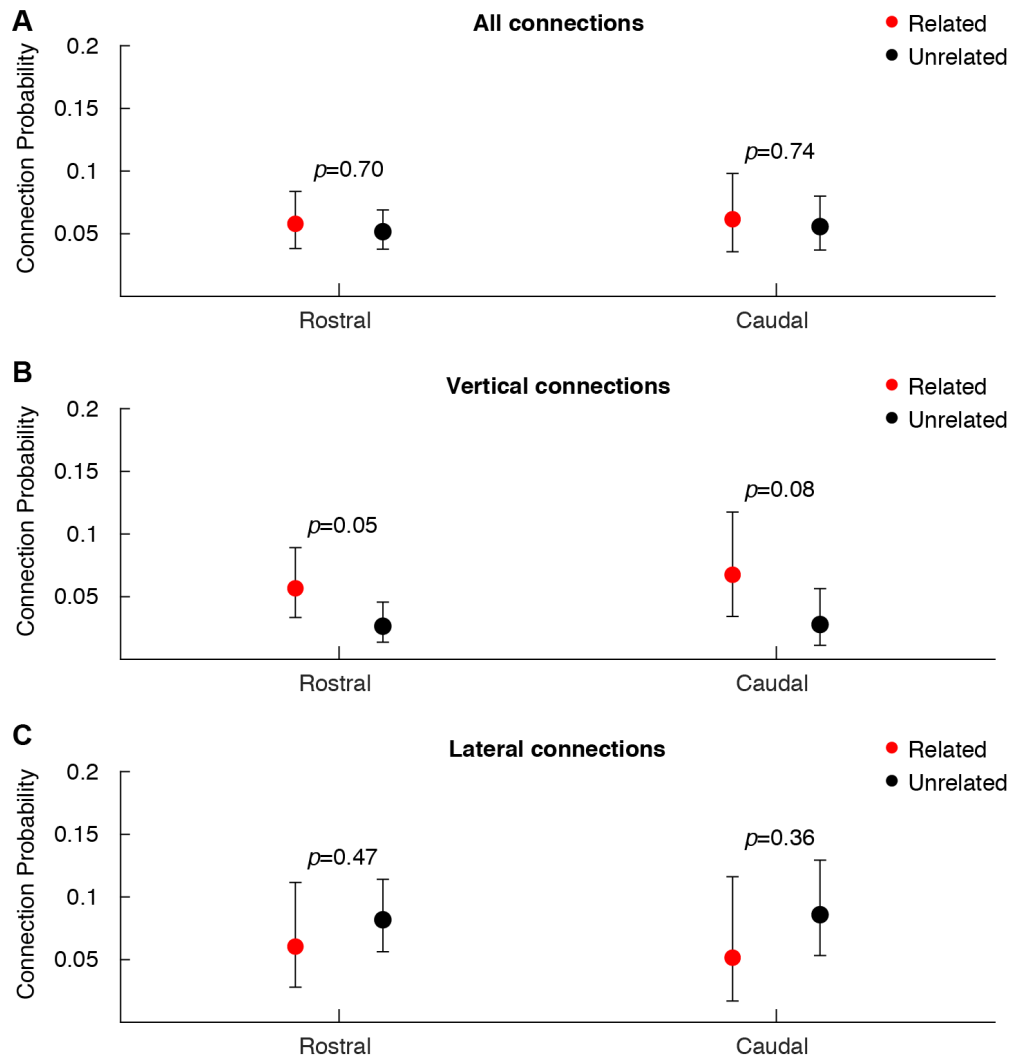

1370

1371 **Figure S7. Connectivity differences between clonally related and unrelated neurons across different**

1372 **rostrocaudal location. (A)** Connection probabilities for all connection types tested, grouped by

1373 rostrocaudal position (n=449 and 260 related pairs and n=833 and 485 unrelated pairs in rostral and

1374 caudal groups, respectively). **(B)** Connection probabilities for all vertical, across-layer connections tested,

1375 grouped by rostrocaudal position (n=300 and 163 related pairs and n=454 and 252 unrelated pairs in

1376 rostral and caudal groups, respectively). **(C)** Connection probabilities for all lateral, within-layer

1377 connections tested, grouped by rostrocaudal position (n=149 and 97 related pairs and n=379 and 233

1378 unrelated pairs in rostral and caudal groups, respectively). Error bars are 95% Clopper-Pearson

1379 confidence intervals and  $p$ -values are computed using Fisher's exact test. Related to Figures 4 and 5.

1380



1381 **Table S1 (.xls file). Gene expression data, related to Figure 2.** Normalized counts, normalized log  
1382 counts, and metadata for all Patch-seq neurons included in our analysis.

1383

1384 **Table S2 (.xls file). Mapping to transcriptomic cell types, related to Figure 3.** Best match for each of our  
1385 cells onto reference transcriptomic cell types, t-SNE coordinates for the reference dataset, and t-SNE  
1386 coordinates for projection of our data onto the reference with measure of uncertainty.

1387

| Term                                       | Estimated<br>Coefficient | SE                   | t-statistic | p-value              |
|--------------------------------------------|--------------------------|----------------------|-------------|----------------------|
| Constant                                   | -1.82                    | 0.43                 | -4.22       | $2.37 \cdot 10^{-5}$ |
| Lineage                                    | -0.47                    | 0.58                 | -0.81       | 0.42                 |
| Connection type                            | -1.55                    | 0.75                 | -2.06       | 0.039                |
| Euclidean distance                         | $-8.42 \cdot 10^{-3}$    | $4.40 \cdot 10^{-3}$ | -1.91       | 0.056                |
| Rostrocaudal position                      | 0.074                    | 0.11                 | 0.65        | 0.51                 |
| Lineage × Connection type                  | 1.25                     | 0.59                 | 2.11        | 0.035                |
| Lineage × Euclidean distance               | $2.05 \cdot 10^{-4}$     | $2.46 \cdot 10^{-3}$ | 0.083       | 0.93                 |
| Lineage × Rostrocaudal position            | 0.028                    | 0.15                 | 0.18        | 0.86                 |
| Connection type × Euclidean distance       | $7.97 \cdot 10^{-3}$     | $3.99 \cdot 10^{-3}$ | 2.00        | 0.046                |
| Connection type × Rostrocaudal position    | $5.86 \cdot 10^{-3}$     | 0.20                 | 0.030       | 0.98                 |
| Euclidean distance × Rostrocaudal position | $-5.97 \cdot 10^{-4}$    | $9.33 \cdot 10^{-4}$ | -0.64       | 0.52                 |

1388

1389 **Table S3. Generalized linear model of connectivity.** Connectivity was modeled as a binomial response  
1390 variable with the following predictors: lineage relationship (1 for related, 0 for unrelated), connection  
1391 type (1 for vertical, 0 for lateral), Euclidean distance between the cells in microns, and rostrocaudal  
1392 position (a numeric factor from 1 to 5) (see Methods). '×' denotes an interaction between two linear terms.  
1393 Overall  $\chi^2=33.5$  compared to constant model,  $p=2.26 \cdot 10^{-4}$ , 1988 error degrees of freedom. The four terms  
1394 with small *p*-values are: connection class (connection probability *P* is lower for control vertical  
1395 connections, compared to control lateral), Euclidean distance (*P* decreases with increasing distance for  
1396 unrelated lateral connections), lineage × connection type (*P* is higher for related vertical pairs), and  
1397 connection type × Euclidean distance (the effect of Euclidean distance on *P* depends on the type of  
1398 connection tested).
